# Supplementary material for: Synthesis and Antioxidative Properties of 1,2,3,4-Tetrahydropyridine Derivatives with Different Substituents in 4-Position
Source: MDPI journal article supplement (doi:10.3390/molecules27217423), 2022-11-01
Supplement: s1 [file s1]

Article

# Synthesis and antioxidative properties of 1,2,3,4-tetrahydropyridine derivatives with different substituents in 4-position

Daniele Aiello<sup>1,2</sup>, Hendrik Jonas<sup>1,3</sup>, Anna Carbone<sup>1,4</sup>, Daniela Carbone<sup>1</sup>, Camilla Pecoraro<sup>1</sup>, Luisa Tesoriere<sup>1</sup>, Jens Köhler<sup>3</sup>, Bernhard Wünsch<sup>3</sup>, Patrizia Diana<sup>1,\*</sup>

<sup>1</sup> Dipartimento di Scienze e Tecnologie Biologiche Chimiche e Farmaceutiche (STEBICEF), Università degli Studi di Palermo, Via Archirafi 32, 90123 Palermo, Italy

<sup>2</sup> Dipartimento di Scienze della Vita, Università degli Studi di Modena e Reggio Emilia, Via Campi 103, 41125 Modena, Italy

<sup>3</sup> Westfälische Wilhelms-Universität Münster, Institut für Pharmazeutische und Medizinische Chemie, Corrensstraße 48, D-48149 Münster, Germany

<sup>4</sup> Dipartimento di Farmacia, Università degli Studi di Genova, Viale Benedetto XV 3, 16132 Genova, Italy

\* Correspondence: patrizia.diana@unipa.it

**Citation:** Lastname, F.; Lastname, F.; Lastname, F. Title. *Molecules* **2022**, *27*, 7423. <https://doi.org/10.3390/molecules27217423>

Academic Editor: Firstname Lastname

Received: date

Accepted: date

Published: date

**Publisher's Note:** MDPI stays neutral with regard to jurisdictional claims in published maps and institutional affiliations.

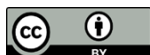

**Copyright:** © 2022 by the authors. Submitted for possible open access publication under the terms and conditions of the Creative Commons Attribution (CC BY) license (<https://creativecommons.org/licenses/by/4.0/>).

| Content                   | Page |
|---------------------------|------|
| 1.0 Folin Cicalteau assay | S2   |
| 2.0 NMR spectra           | S3   |

## 1. Folin-Ciocalteu assay

### 1.1 Preliminary procedures

- Prepare a solution of  $\text{Na}_2\text{CO}_3$  2 % (w/v) by weighting 2 g of  $\text{Na}_2\text{CO}_3$  and dissolve in 100 mL of distilled water.
- Dilute FCR with distilled water to obtain a solution 50 % (v/v).
- Prepare a solution of Gallic acid (standard) 6 mM by weighting 1 mg of gallic acid (PM = 170,12) and solubilize in 1 mL of distilled water.

The quantities of solution of gallic acid 6 mM used are:

- 10  $\mu\text{L}$  (10  $\mu\text{g}$ ) + 90  $\mu\text{L}$  di  $\text{H}_2\text{O}$
- 30  $\mu\text{L}$  (30  $\mu\text{g}$ ) + 70  $\mu\text{L}$  di  $\text{H}_2\text{O}$
- 50  $\mu\text{L}$  (50  $\mu\text{g}$ ) + 50  $\mu\text{L}$  di  $\text{H}_2\text{O}$
- 70  $\mu\text{L}$  (70  $\mu\text{g}$ ) + 30  $\mu\text{L}$  di  $\text{H}_2\text{O}$

The final volumes of the sample and standard must be equal to 100  $\mu\text{L}$ .

### 1.2 General procedure

- In each tube add the exact volume of distilled water to reach 100  $\mu\text{L}$  then add sample or standard.
- Prepare the standard with 100  $\mu\text{L}$ .
- Add 3 mL of 2%  $\text{Na}_2\text{CO}_3$  (w/v) solution.
- Add 100  $\mu\text{L}$  of FCR solution 50 % (v/v).
- Stirring and incubation at RT in dark place for 60 min
- Measure the optical density with an UV-spectrophotometer at 765 nm.
- Create the curve for data analysis
- Express the results in mg GAE/g sample.

### 1.3 Determination of the TPC of compounds 21

The samples were solubilized in DMSO to obtain a 100 mM solution. For each sample two aliquots of 1  $\mu\text{L}$  and 100  $\mu\text{L}$  were used and the volumes were adjusted to 100  $\mu\text{L}$  with distilled water. To the samples 3 mL of 2%  $\text{Na}_2\text{CO}_3$  (w/v) solution were added followed by addition of 100  $\mu\text{L}$  of FCR. The samples were incubated for 60 min in a dark place at RT. After 60 min no color change was observed indicating the absence of antioxidant activity.

## 2. NMR spectra

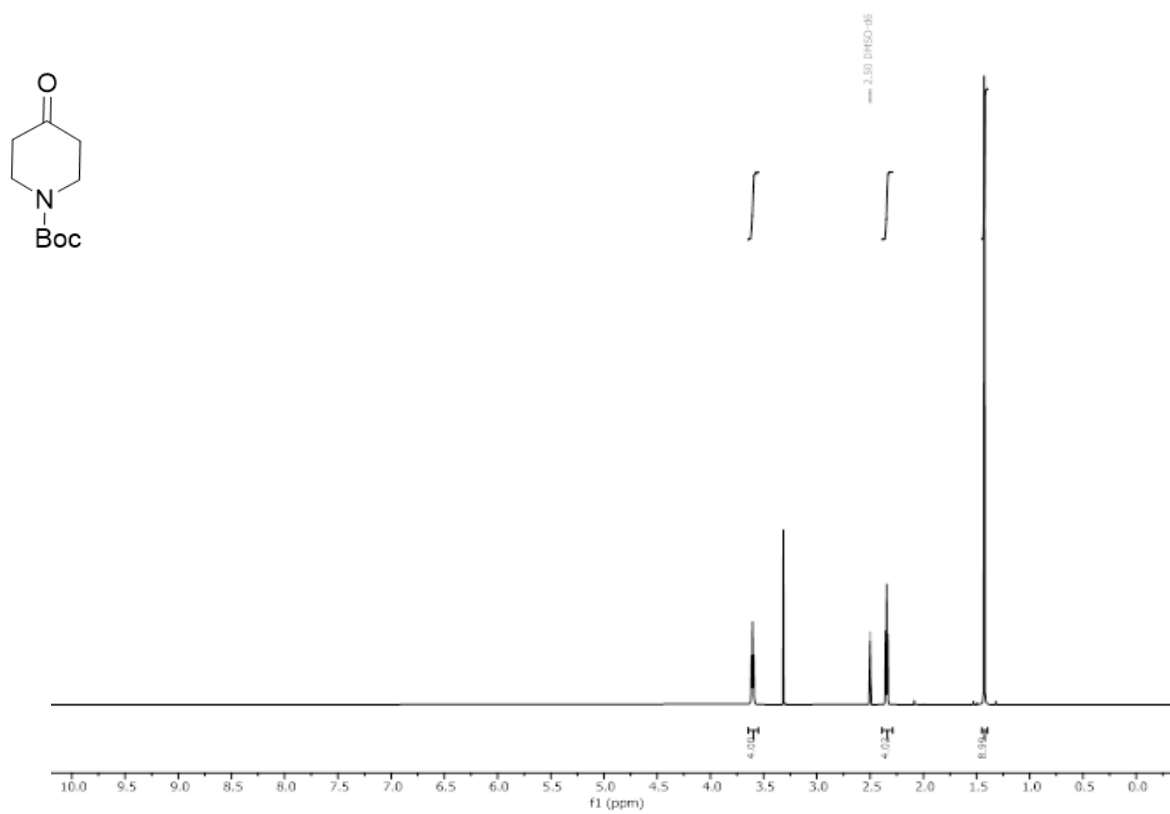<sup>1</sup>H NMR spectrum (DMSO-d<sub>6</sub>) of **18**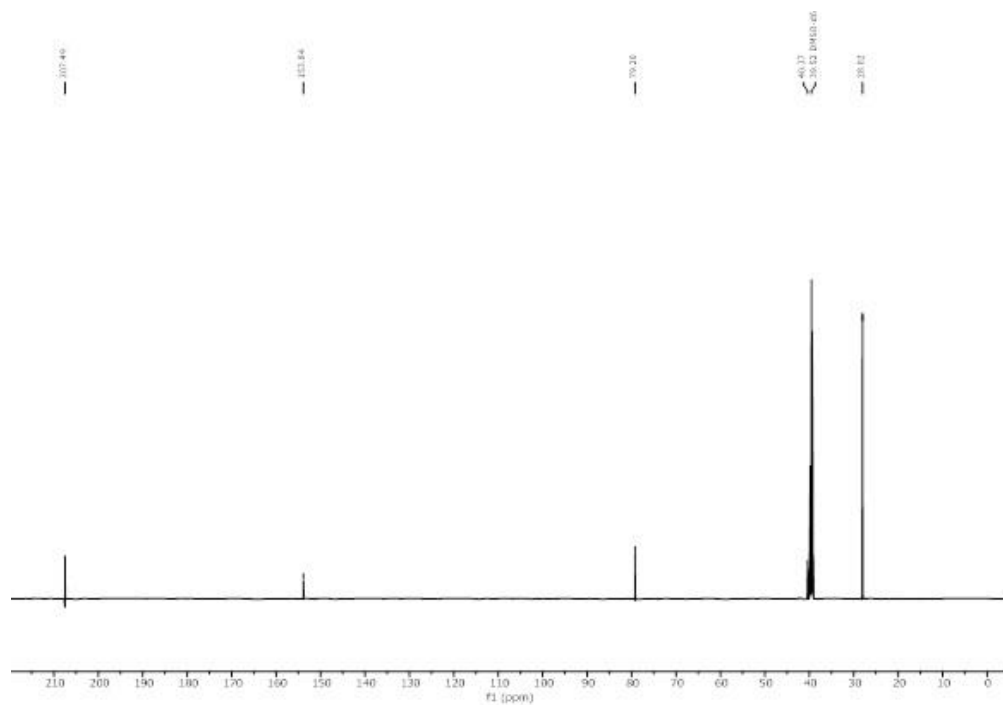<sup>13</sup>C NMR spectrum (DMSO-d<sub>6</sub>) of **18**

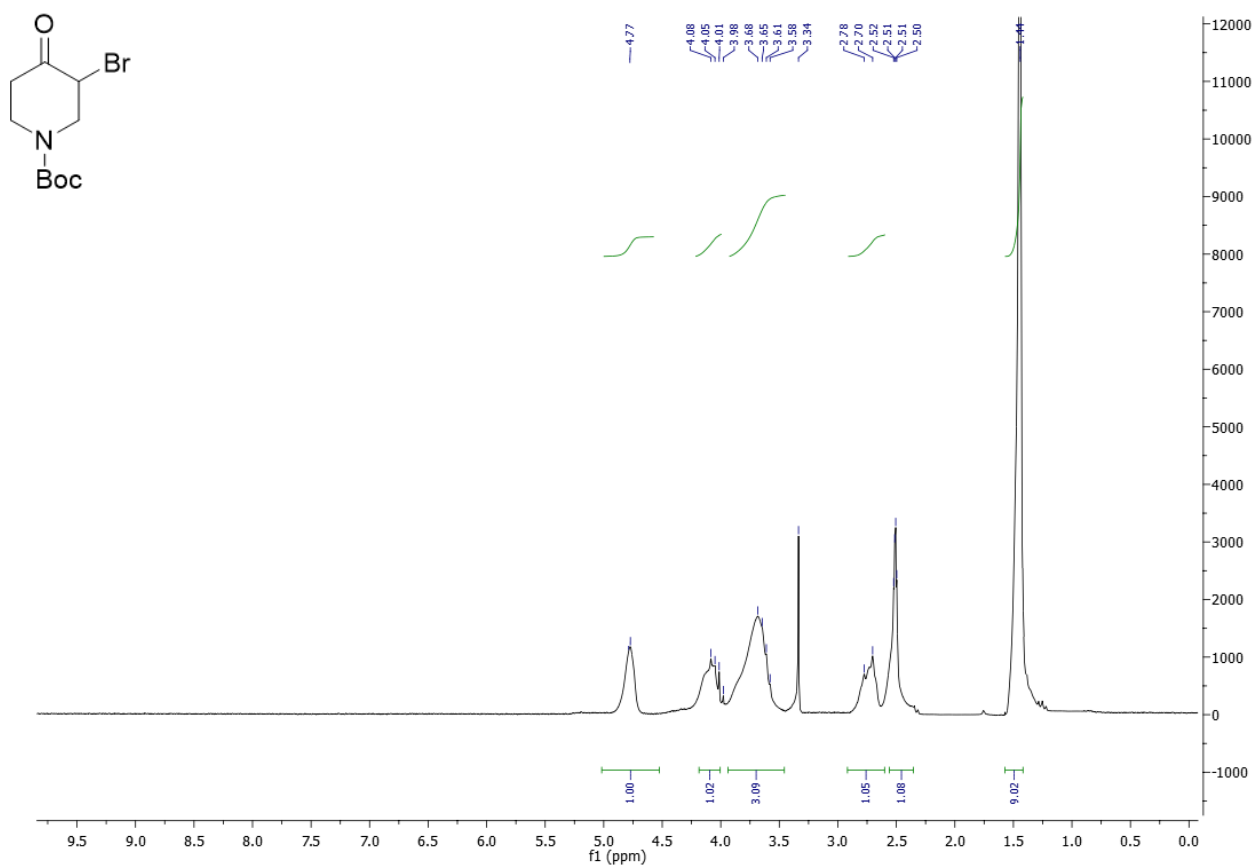

$^1\text{H}$  NMR spectrum (DMSO- $d_6$ ) of 17.

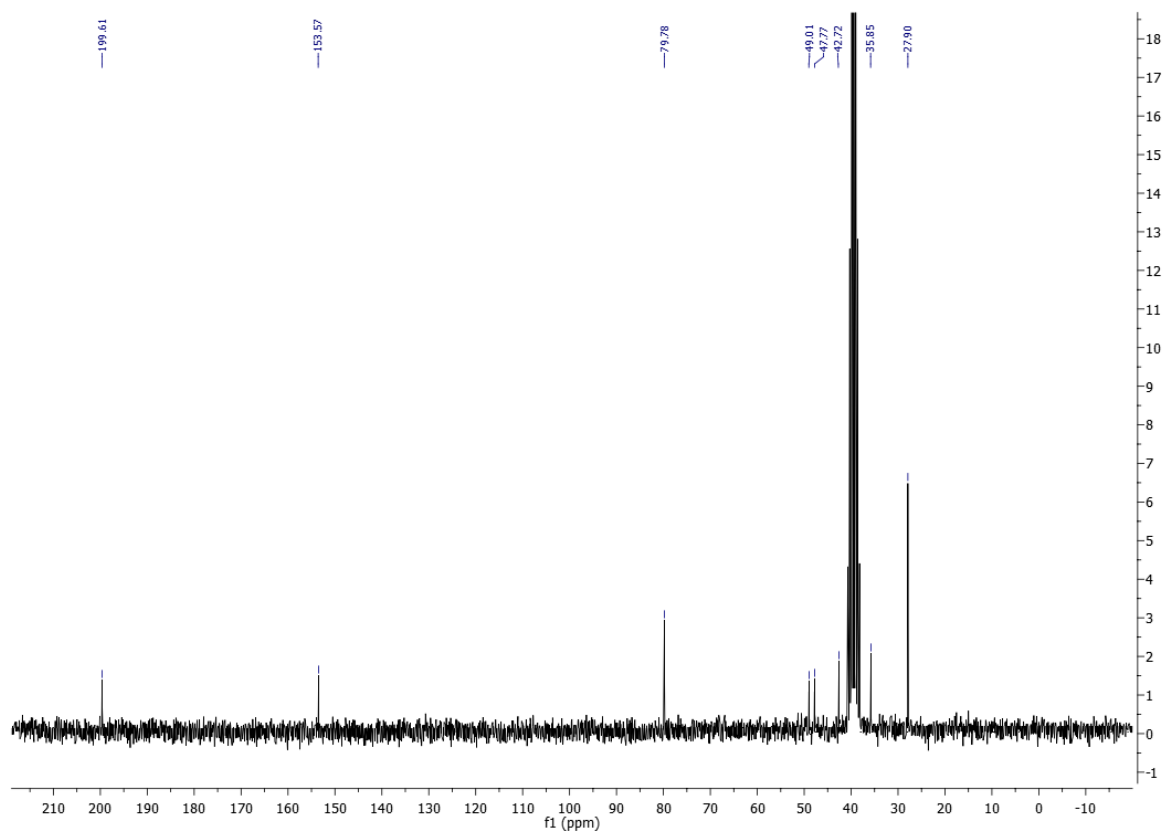

$^{13}\text{C}$  NMR spectrum (DMSO- $d_6$ ) of 17

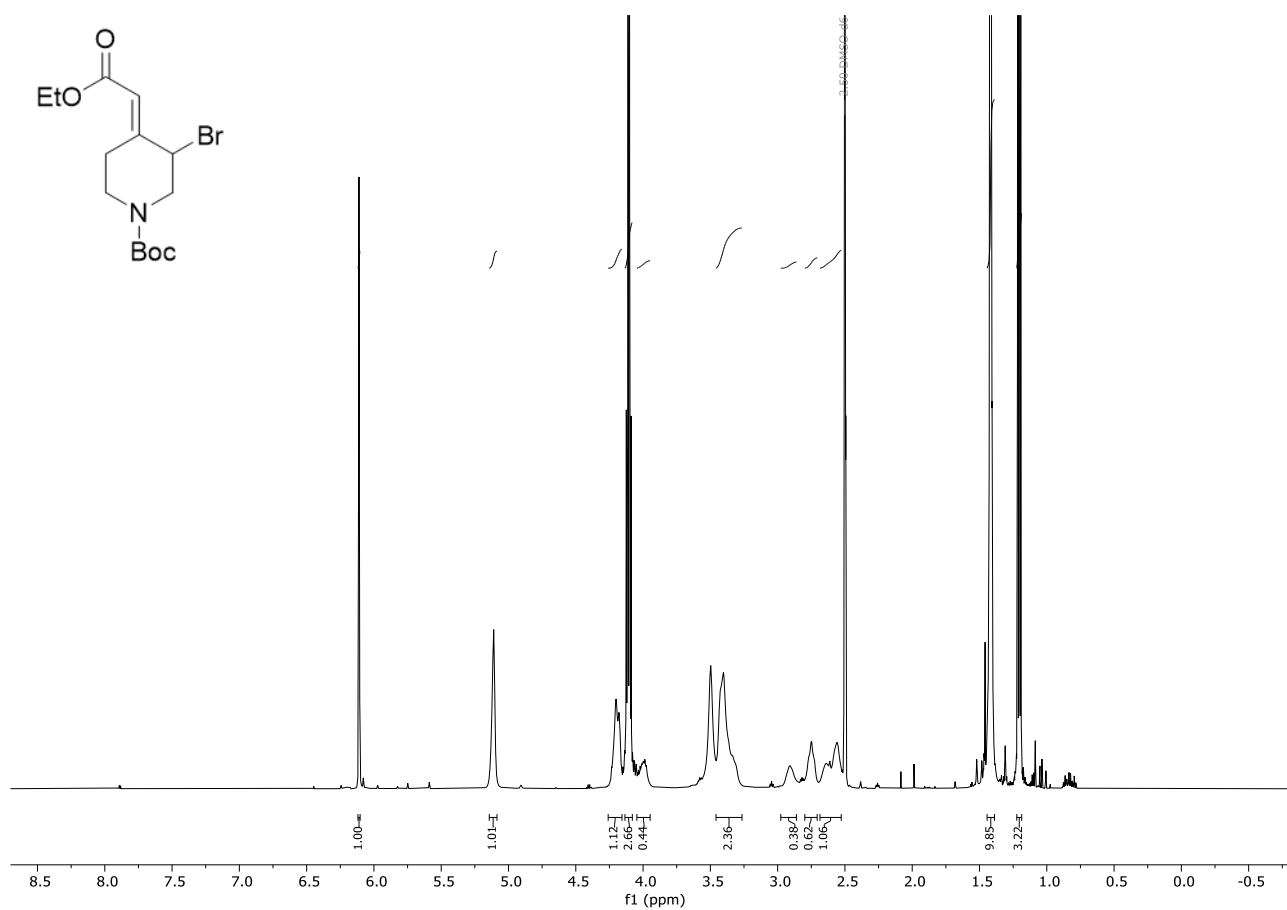

<sup>1</sup>H NMR spectrum (DMSO-d<sub>6</sub>) of **16**.

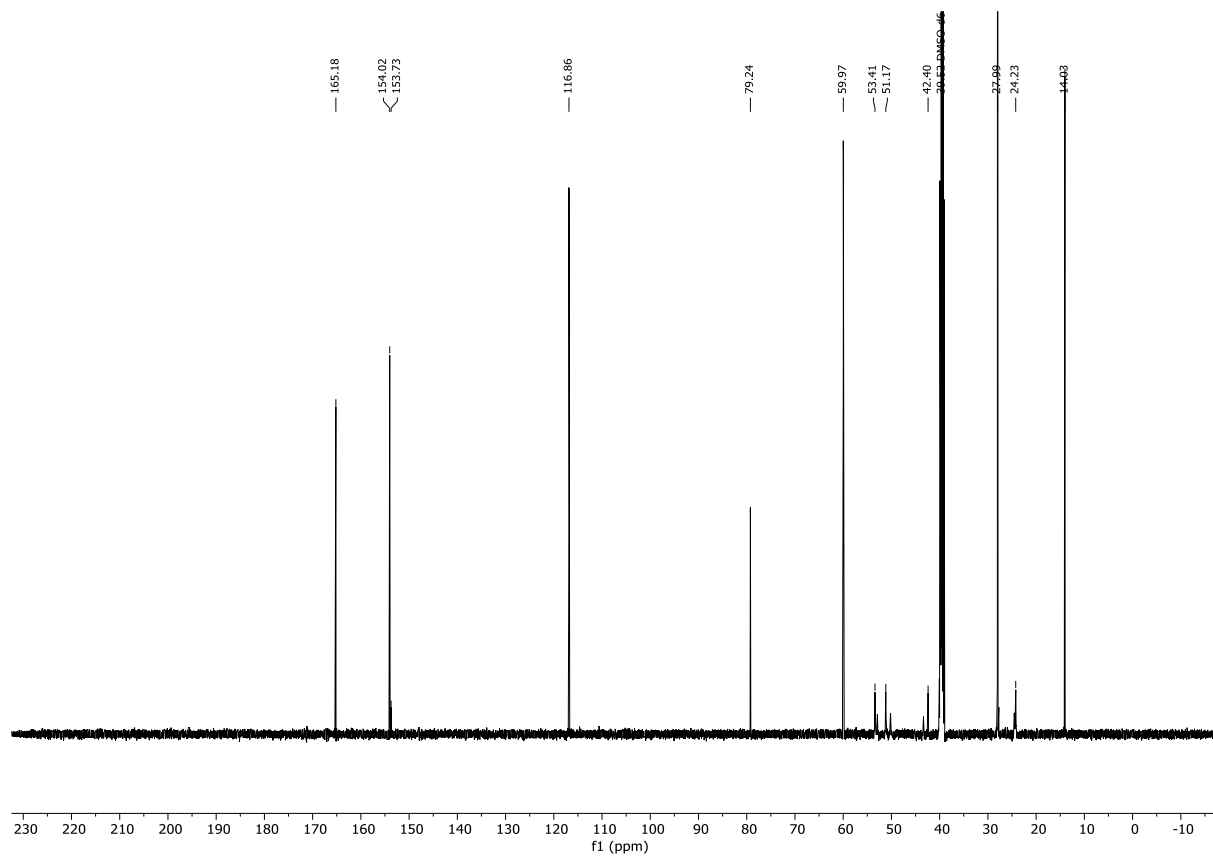

<sup>13</sup>C NMR spectrum (DMSO-d<sub>6</sub>) of **16**.

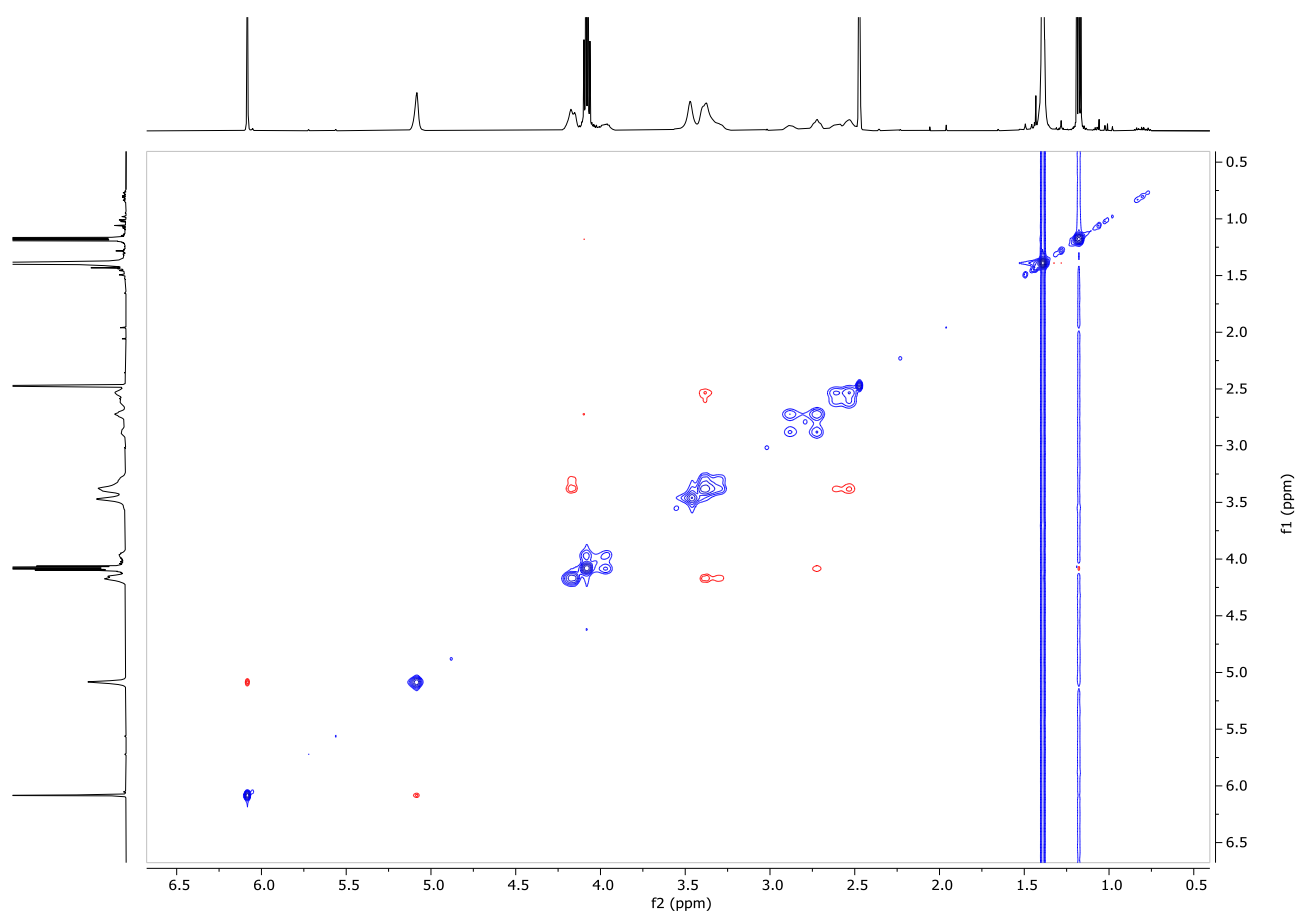NOESY spectrum of **16**

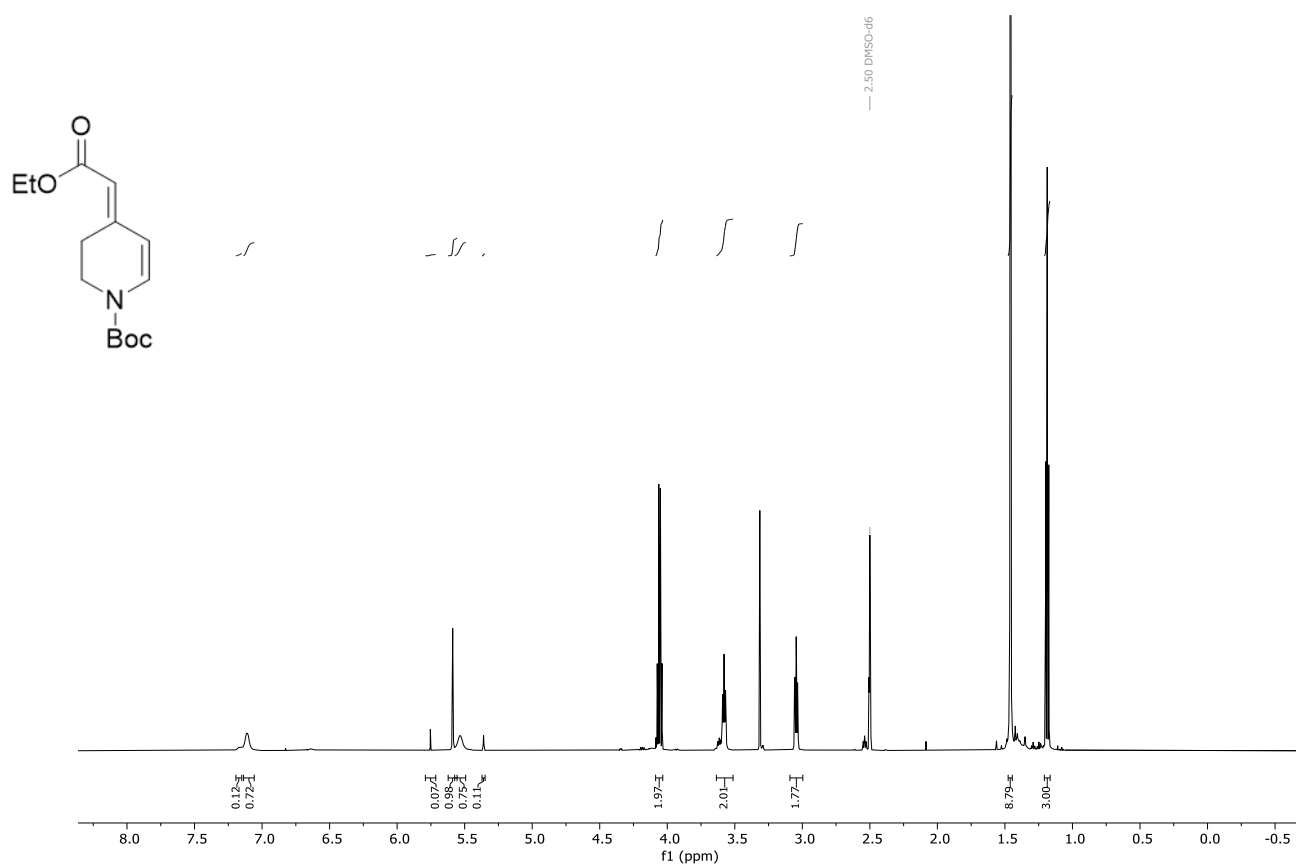

<sup>1</sup>H NMR spectrum (DMSO-d<sub>6</sub>) of **15**.

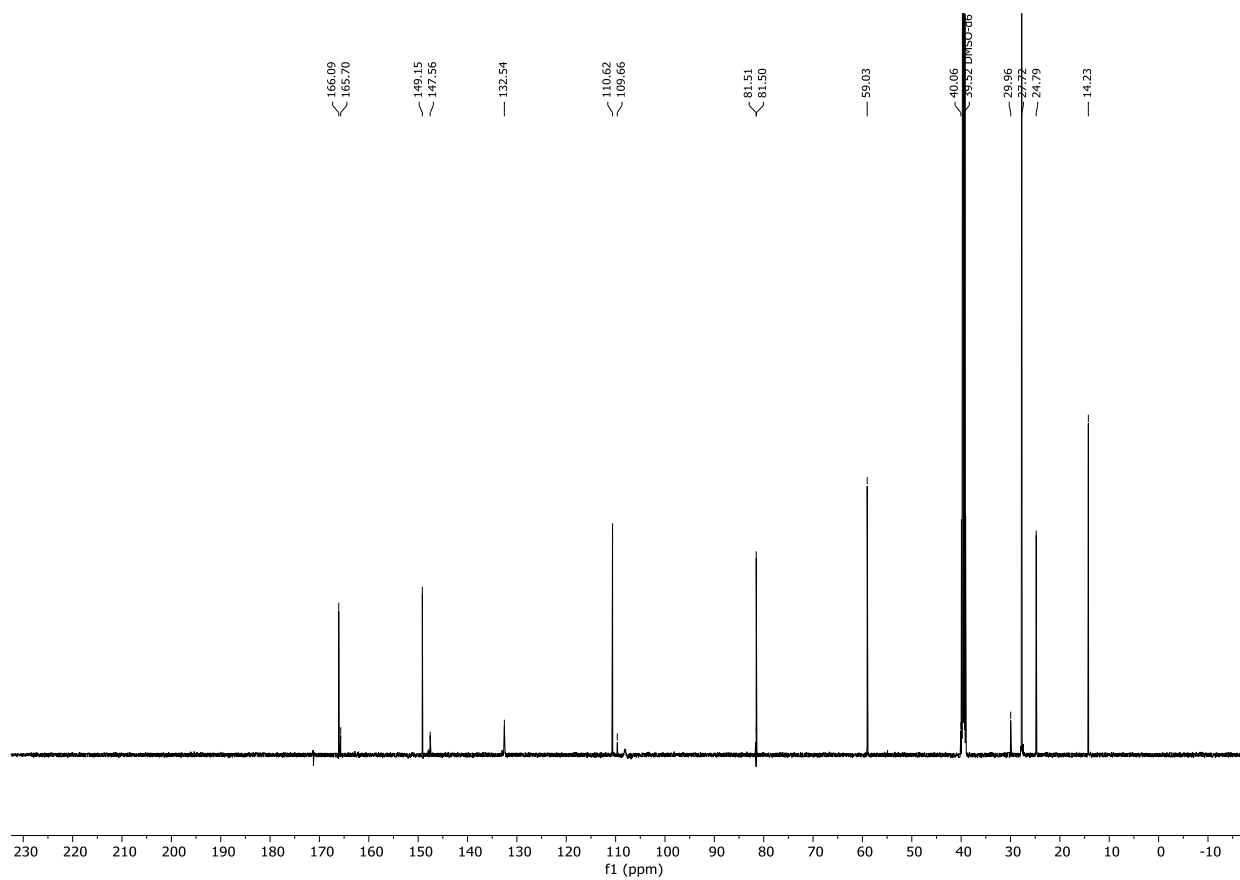

<sup>13</sup>C NMR spectrum (DMSO-d<sub>6</sub>) of **15**.

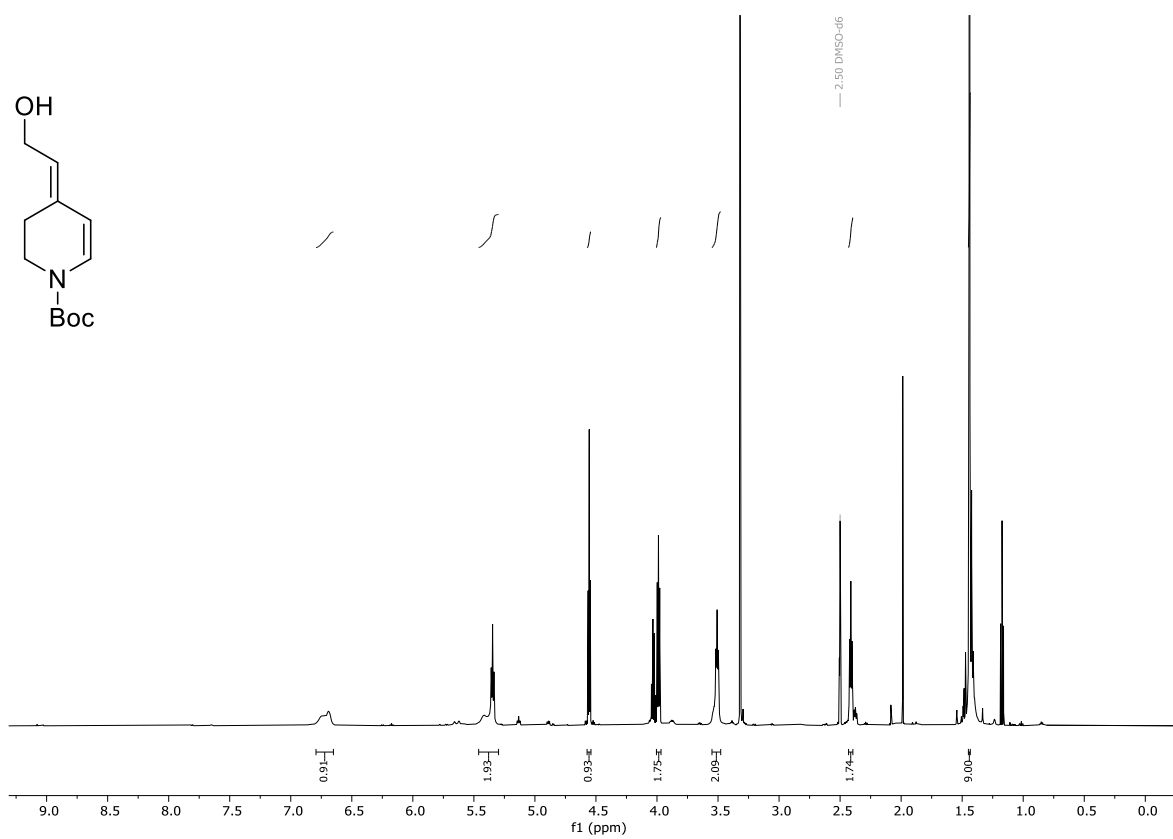

<sup>1</sup>H NMR spectrum (DMSO-d<sub>6</sub>) of **20**.

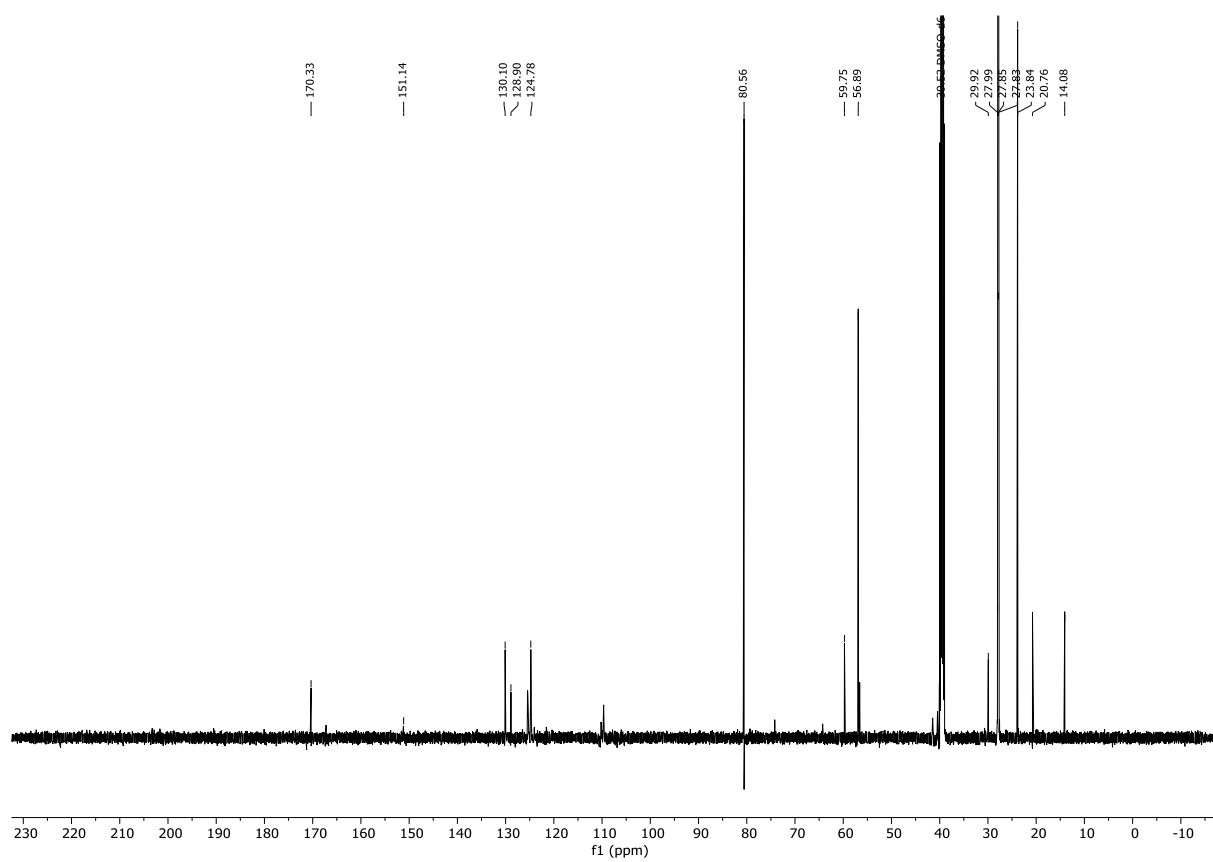

<sup>13</sup>C NMR spectrum (DMSO-d<sub>6</sub>) of **20**.



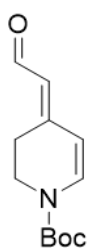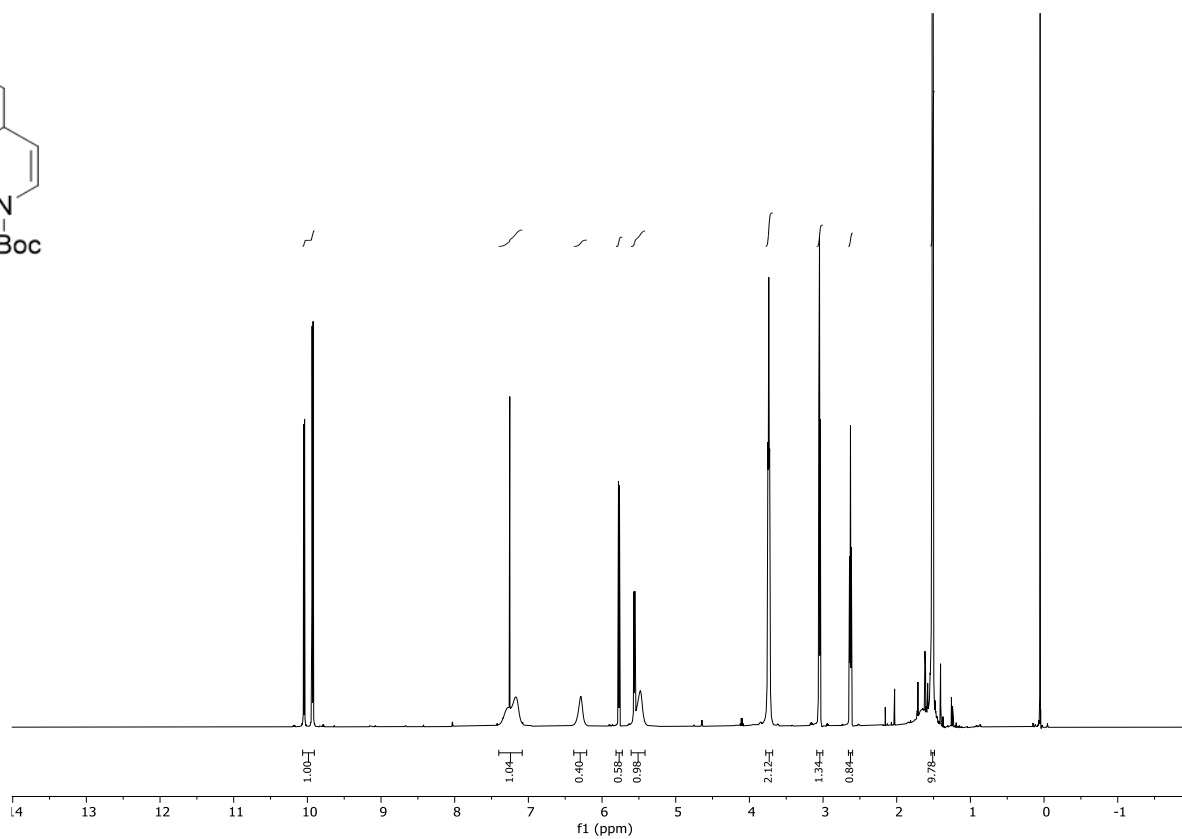

$^1\text{H}$  NMR spectrum ( $\text{CDCl}_3$ ) of **21**.

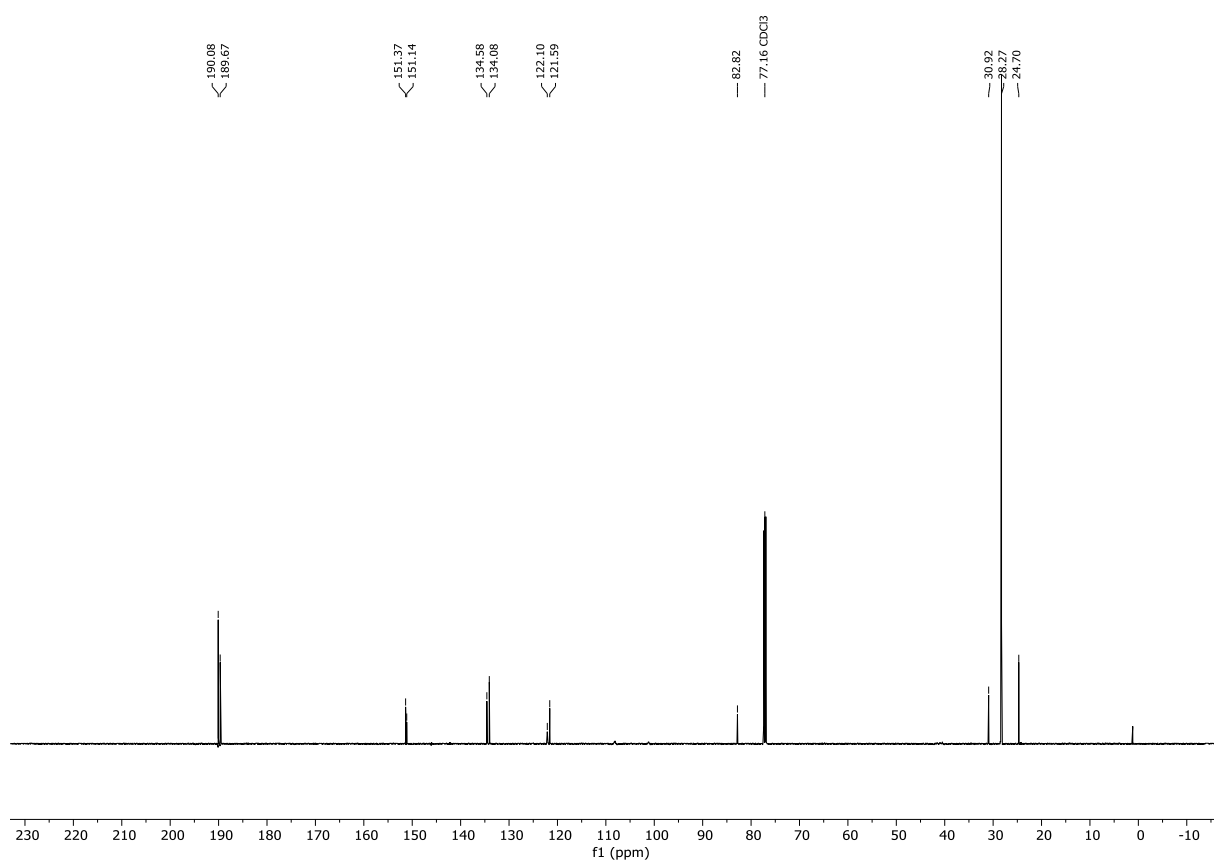

$^{13}\text{C}$  NMR spectrum ( $\text{CDCl}_3$ ) of **21**.

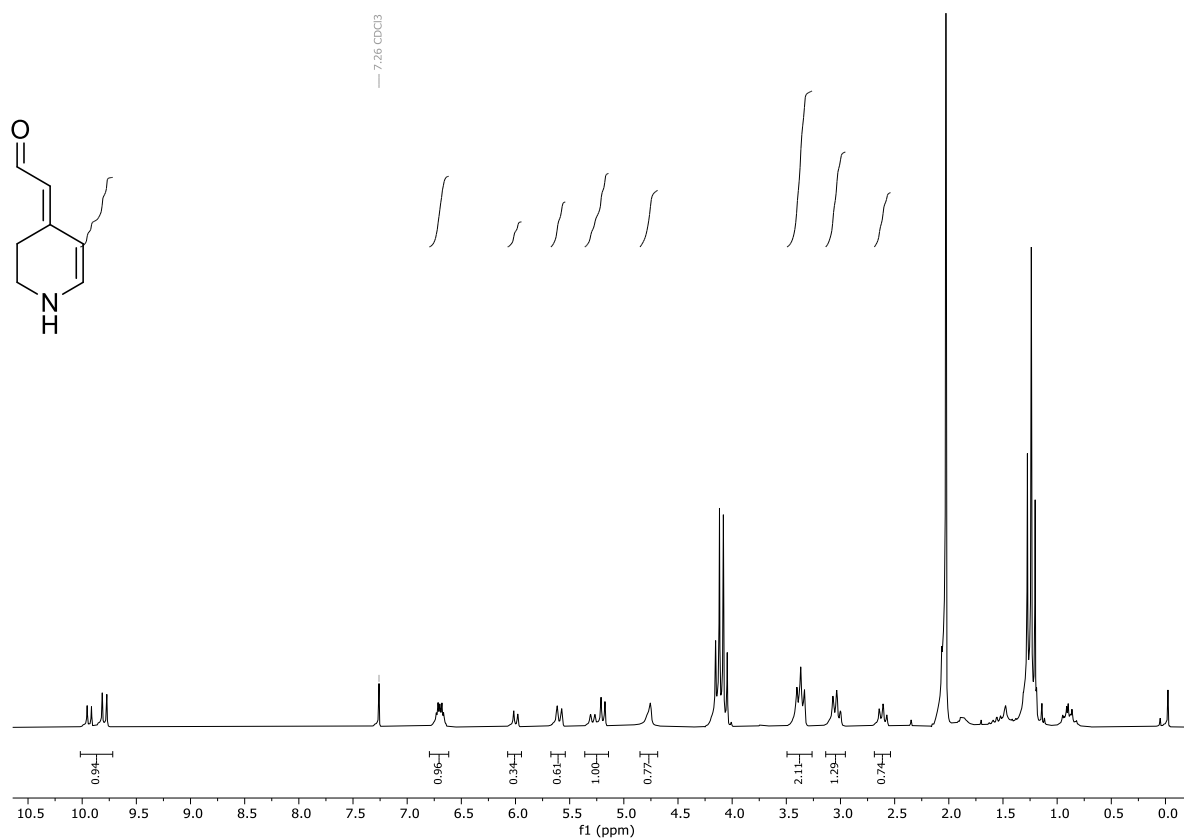

$^1\text{H}$  NMR spectrum ( $\text{CDCl}_3$ ) of **13**.

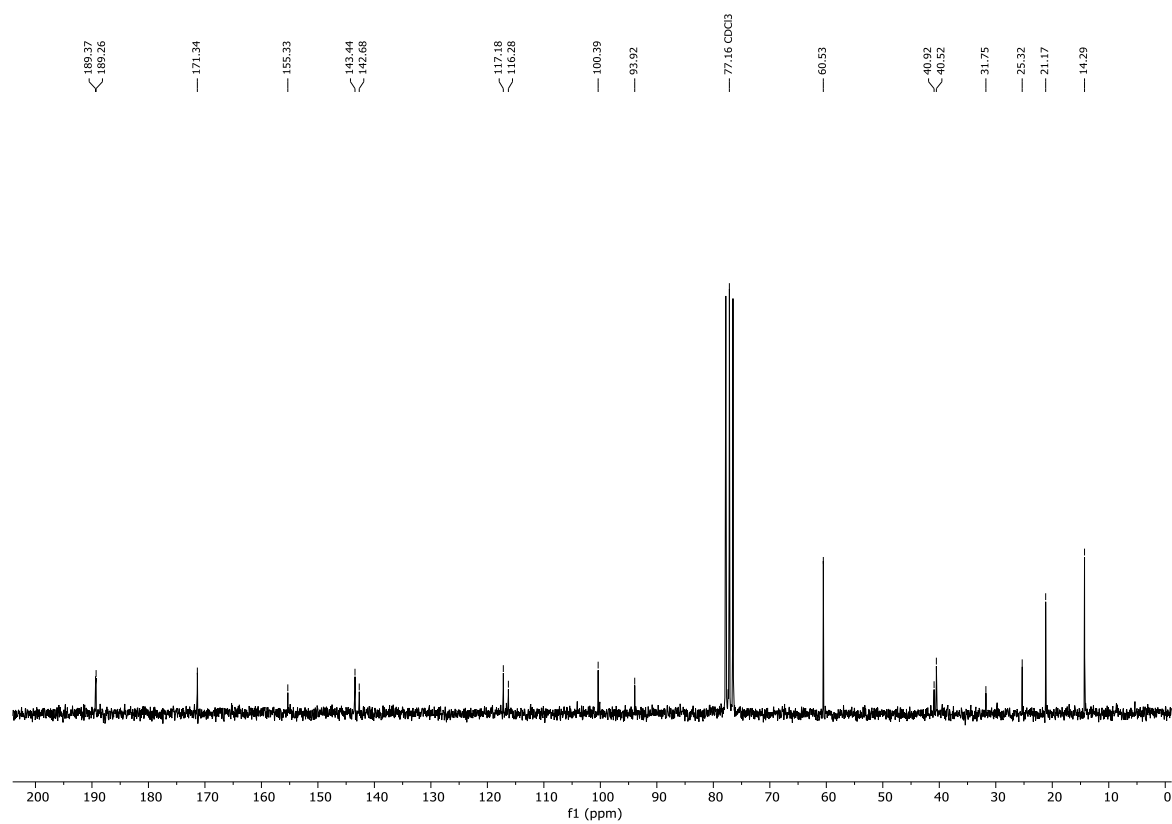

$^{13}\text{C}$  NMR spectrum ( $\text{CDCl}_3$ ) of **13**.

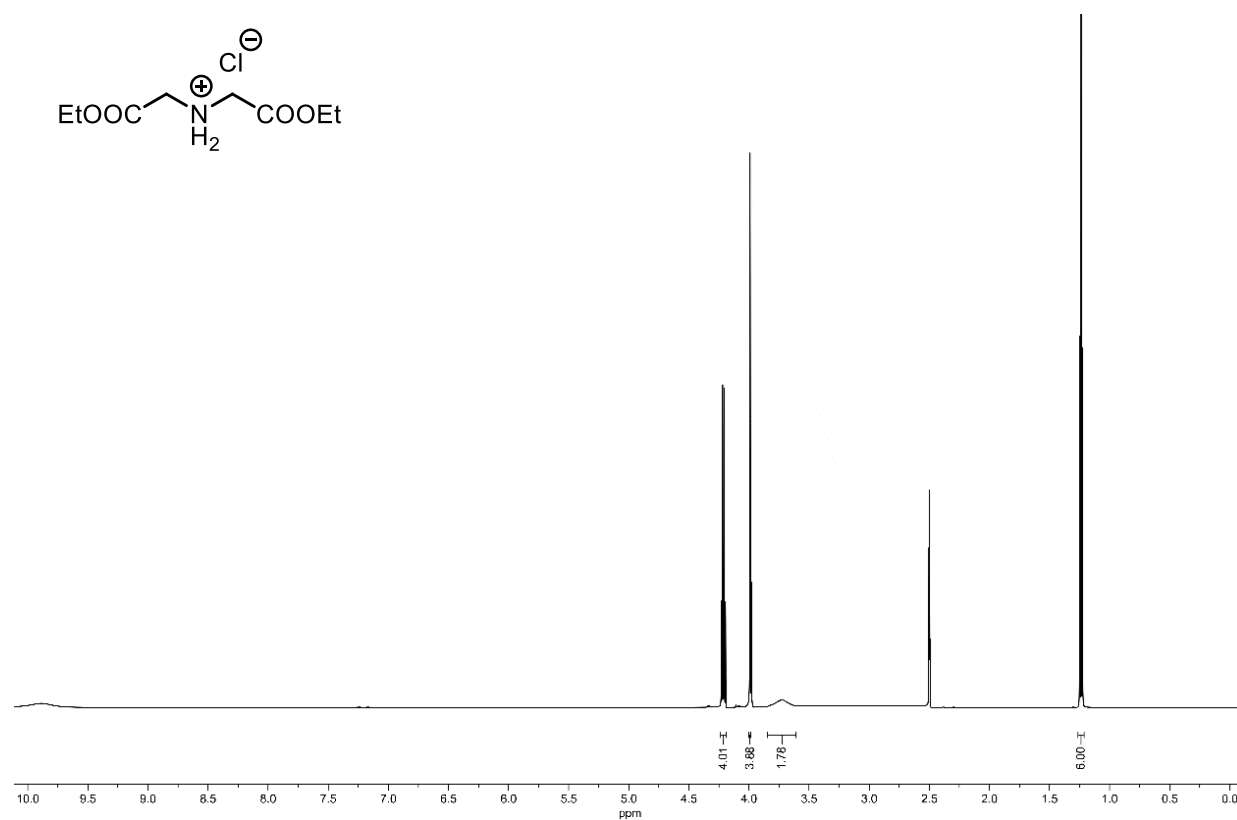

<sup>1</sup>H NMR spectrum (DMSO-*d*<sub>6</sub>) of **28**.

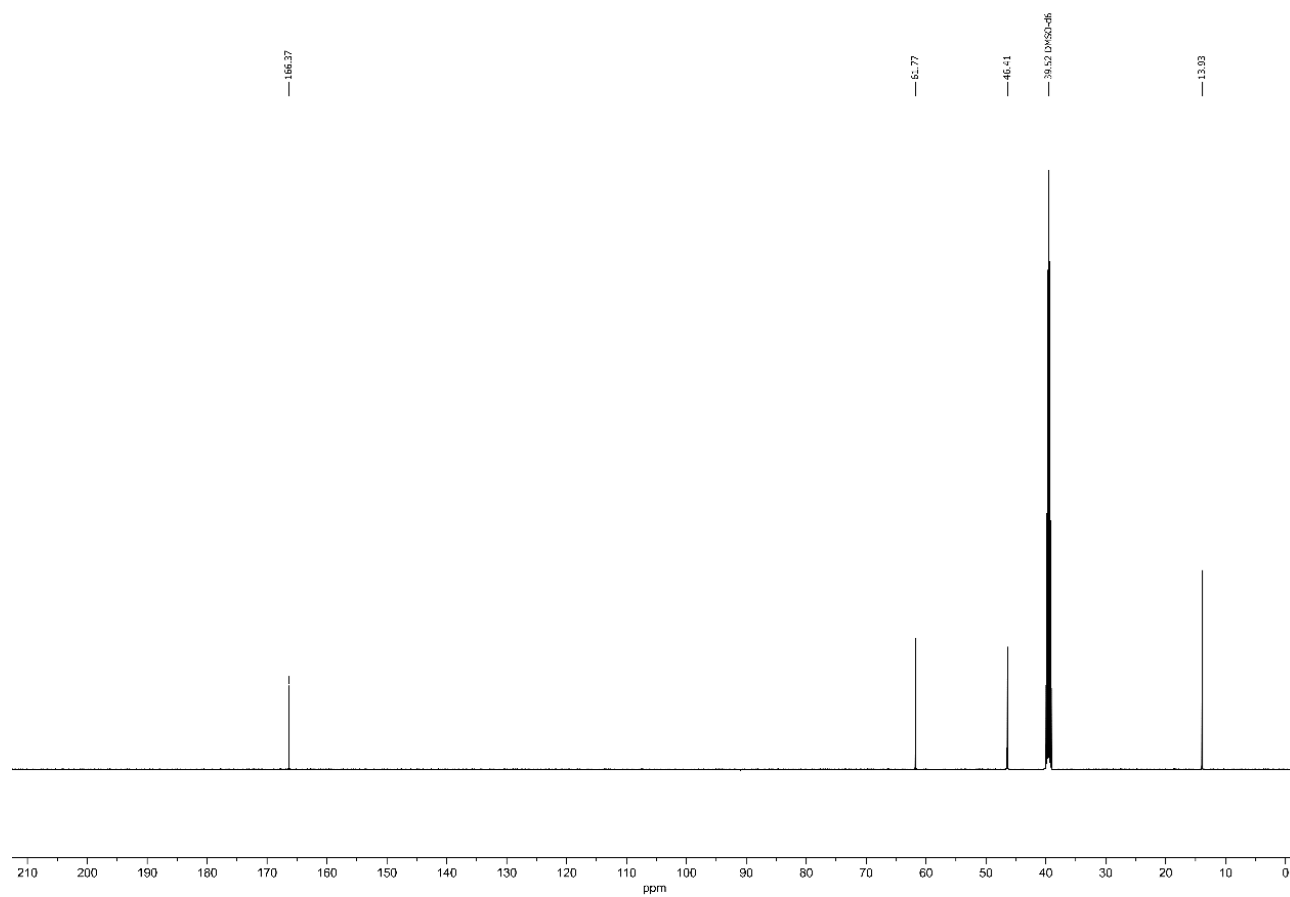

<sup>13</sup>C NMR spectrum (DMSO-*d*<sub>6</sub>) of **28**.

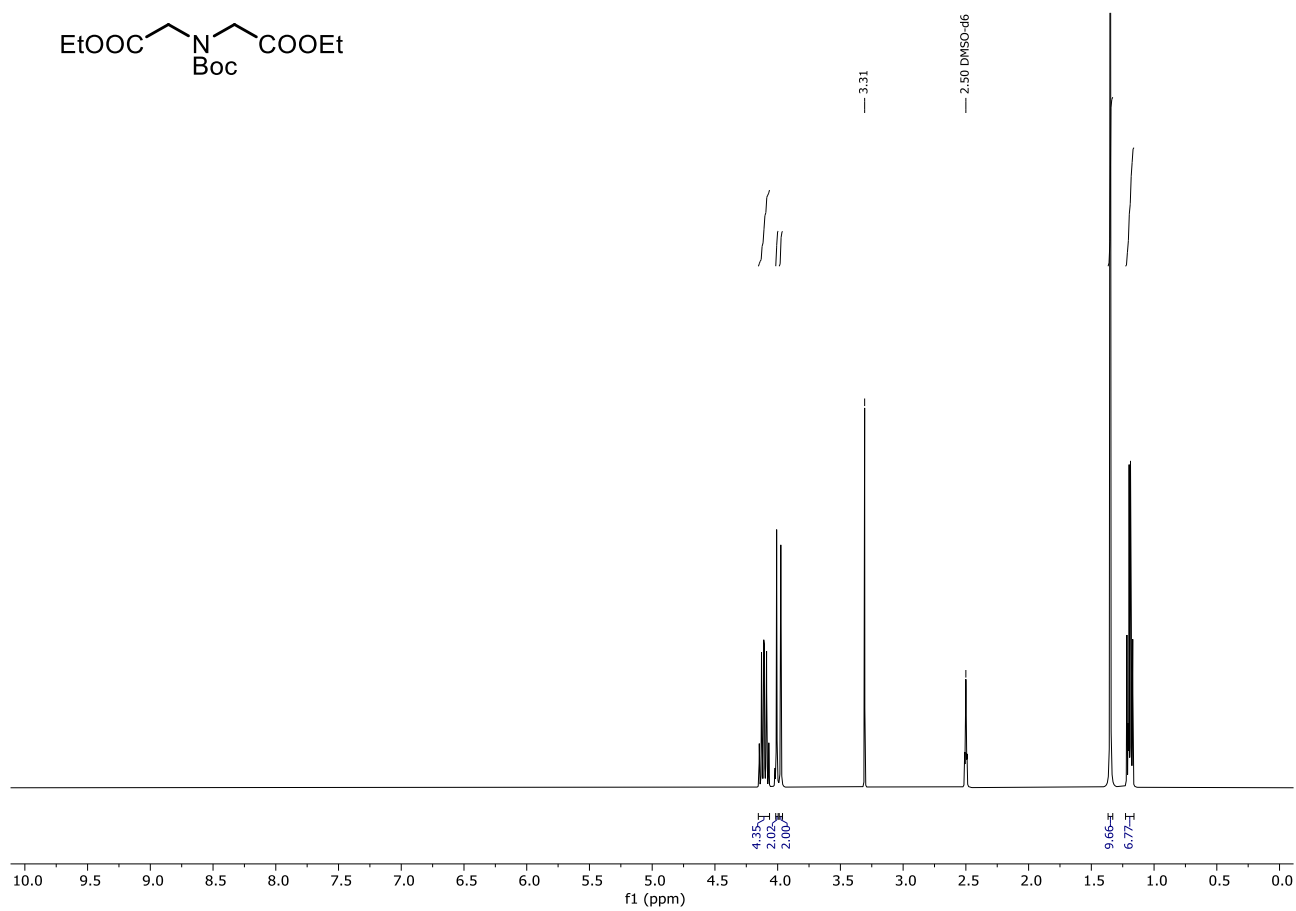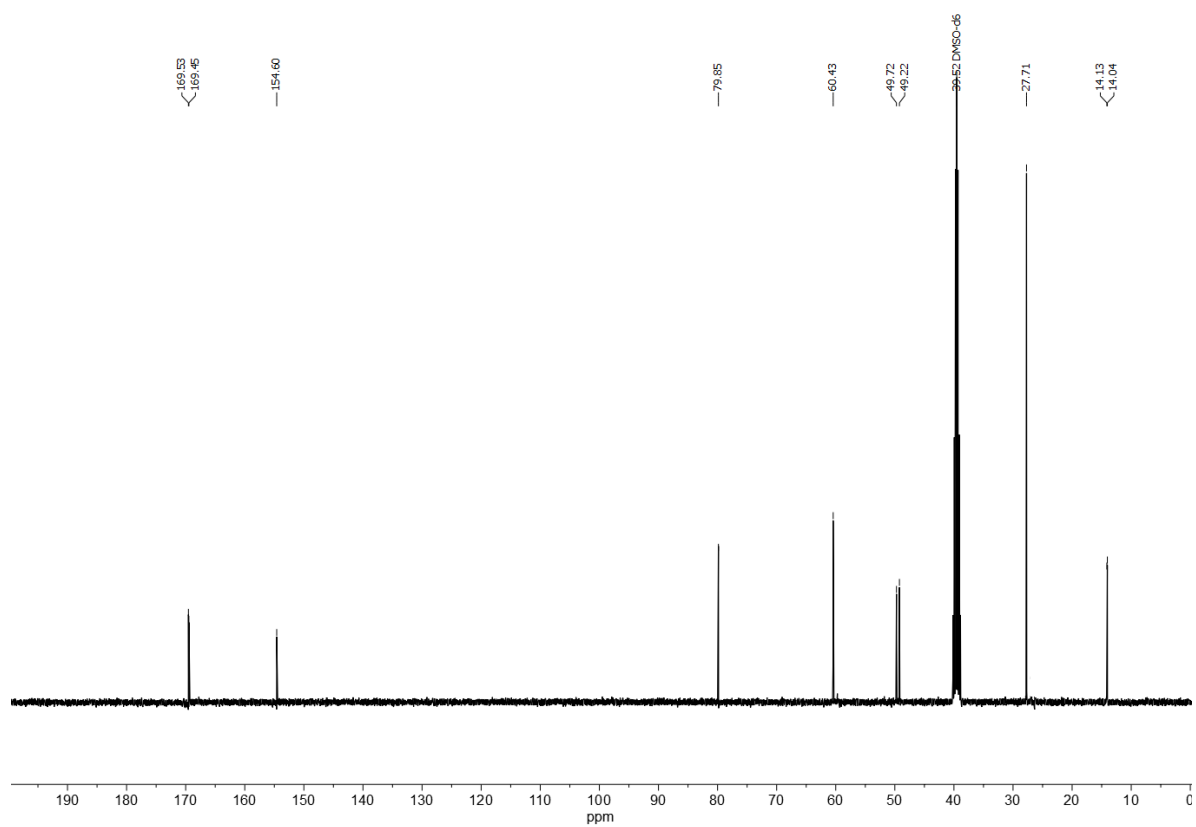

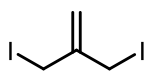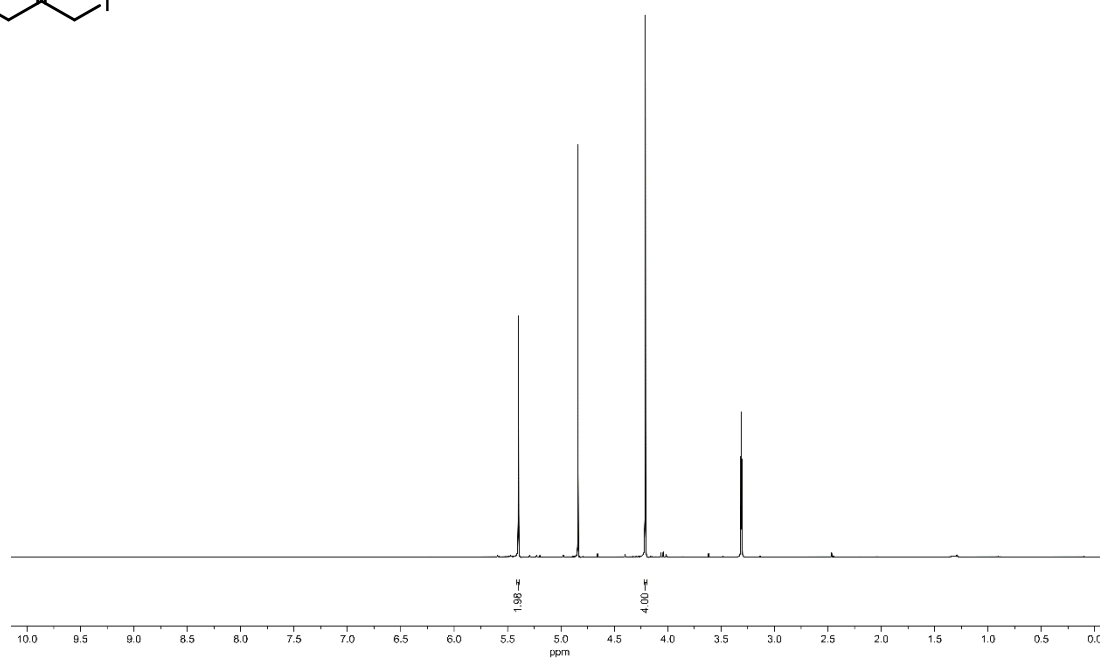

<sup>1</sup>H NMR spectrum (CD<sub>3</sub>OD) of **29**.

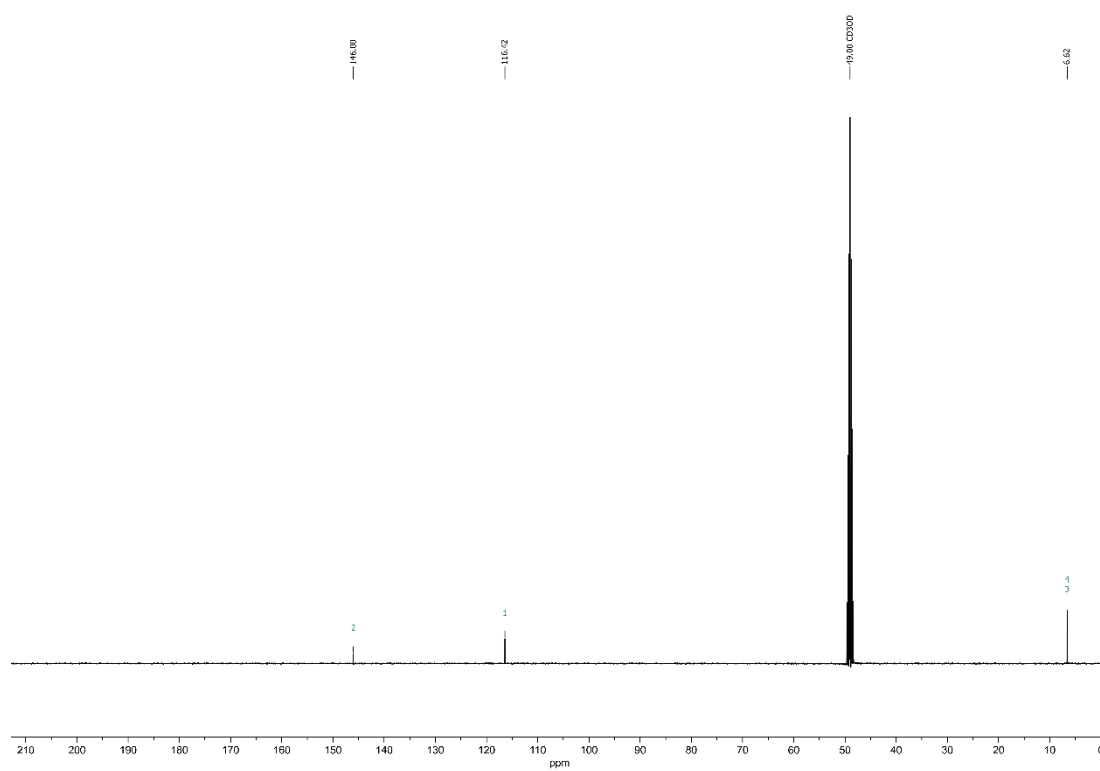

<sup>13</sup>C NMR spectrum (CD<sub>3</sub>OD) of **29**.

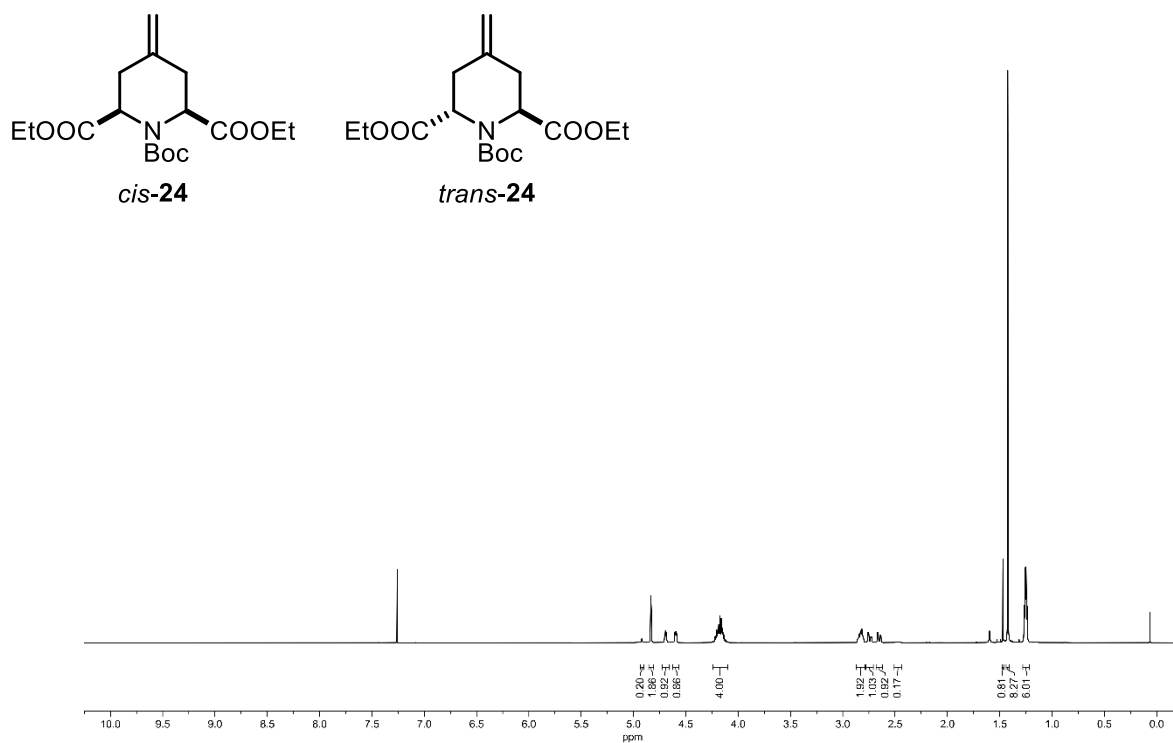

$^1\text{H}$  NMR spectrum ( $\text{CDCl}_3$ ) of **24**. The diastereomers were obtained in a 9:1 ratio.

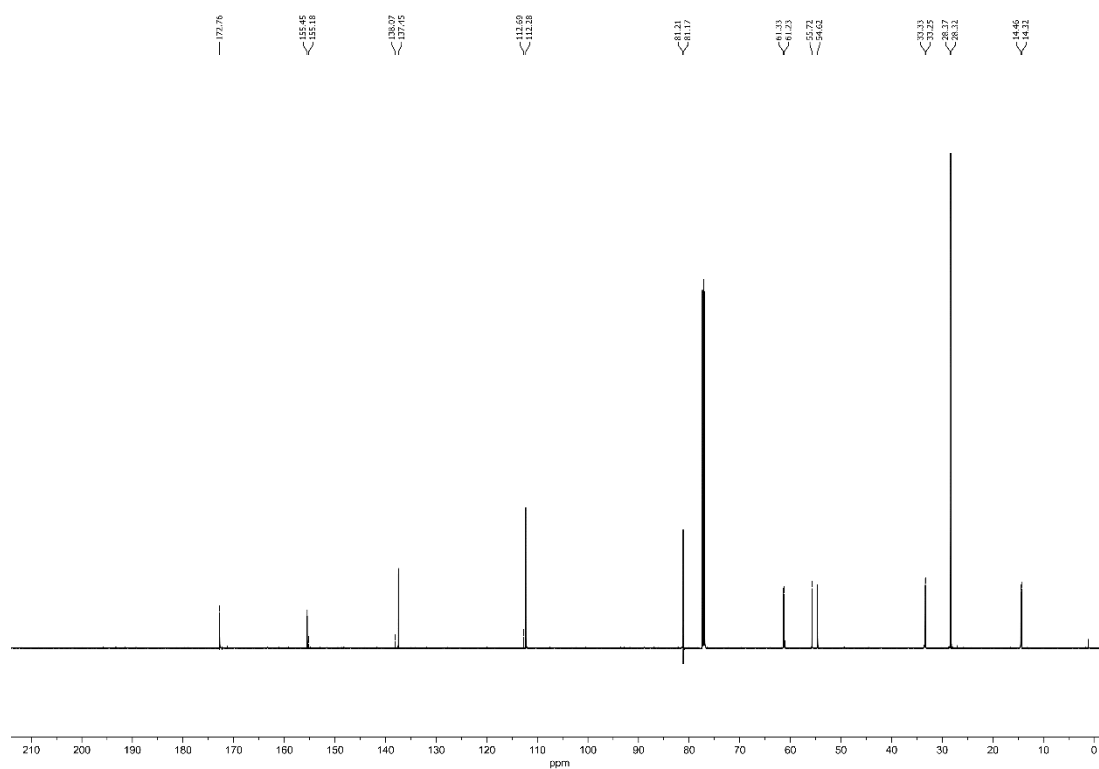

$^{13}\text{C}$  NMR spectrum ( $\text{CDCl}_3$ ) of **24**. The diastereomers were obtained in a 9:1 ratio.

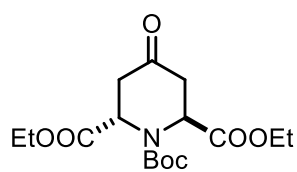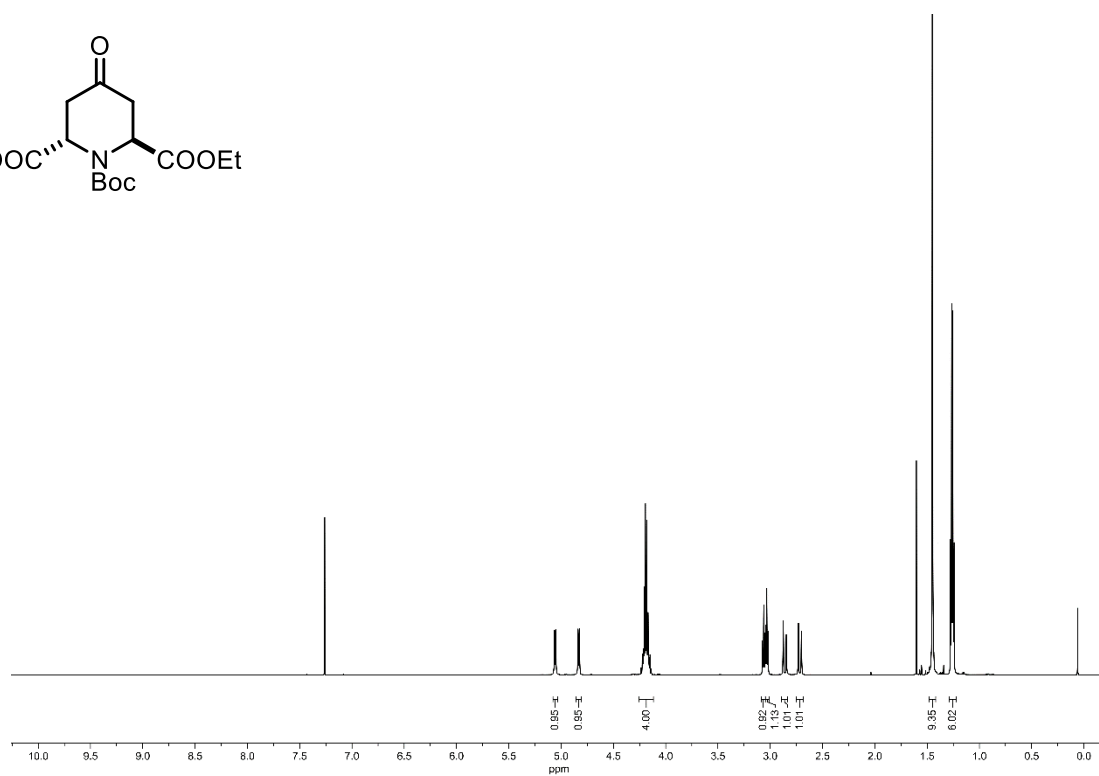

$^1\text{H}$  NMR spectrum ( $\text{CDCl}_3$ ) of **30**.

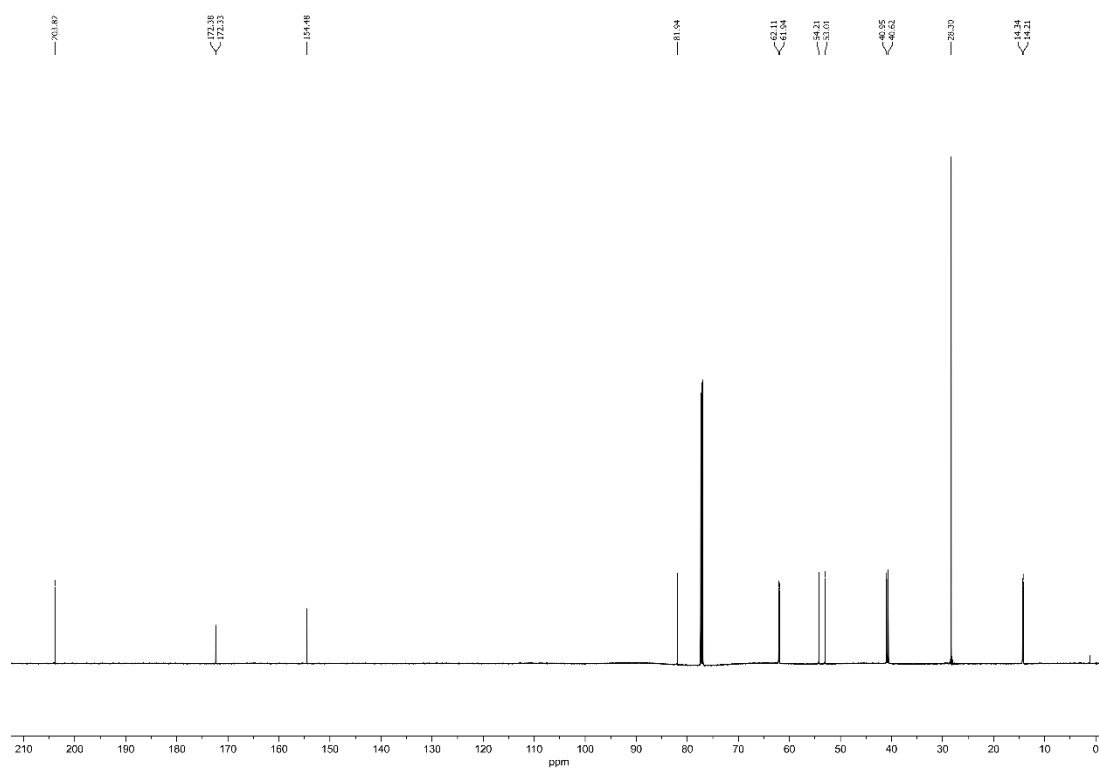

$^{13}\text{C}$  NMR spectrum ( $\text{CDCl}_3$ ) of **30**.

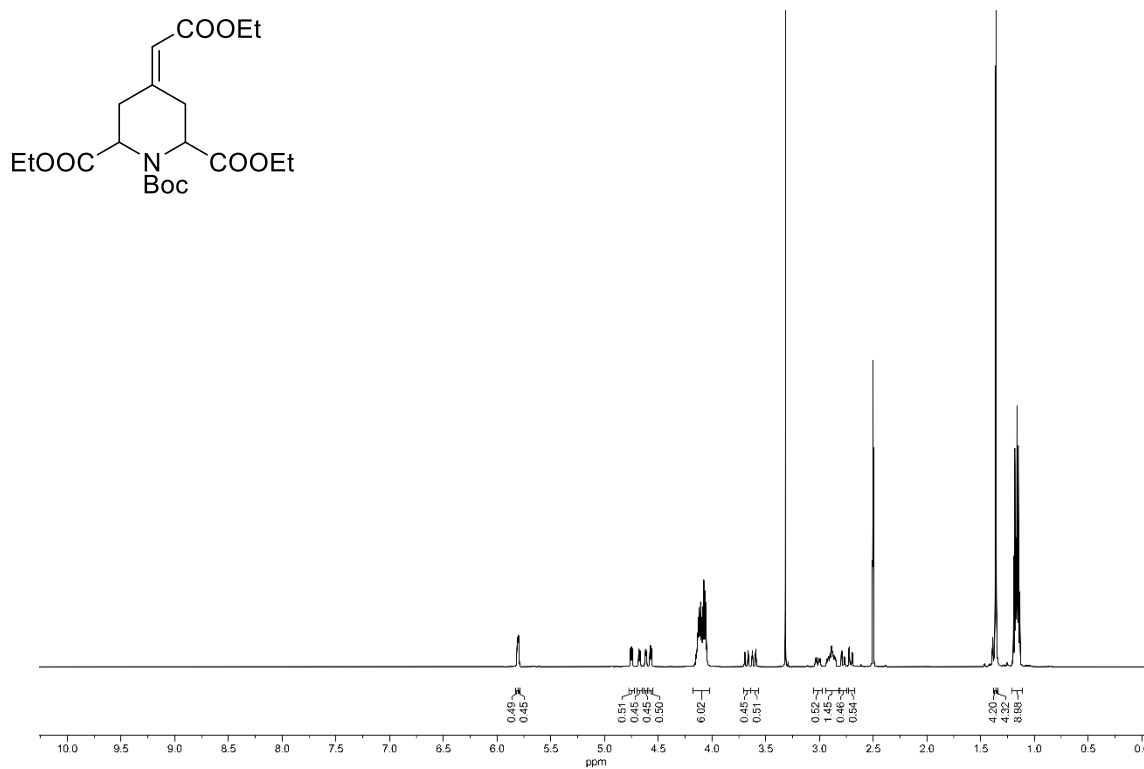

<sup>1</sup>H NMR spectrum (DMSO-*d*<sub>6</sub>) of **31**.

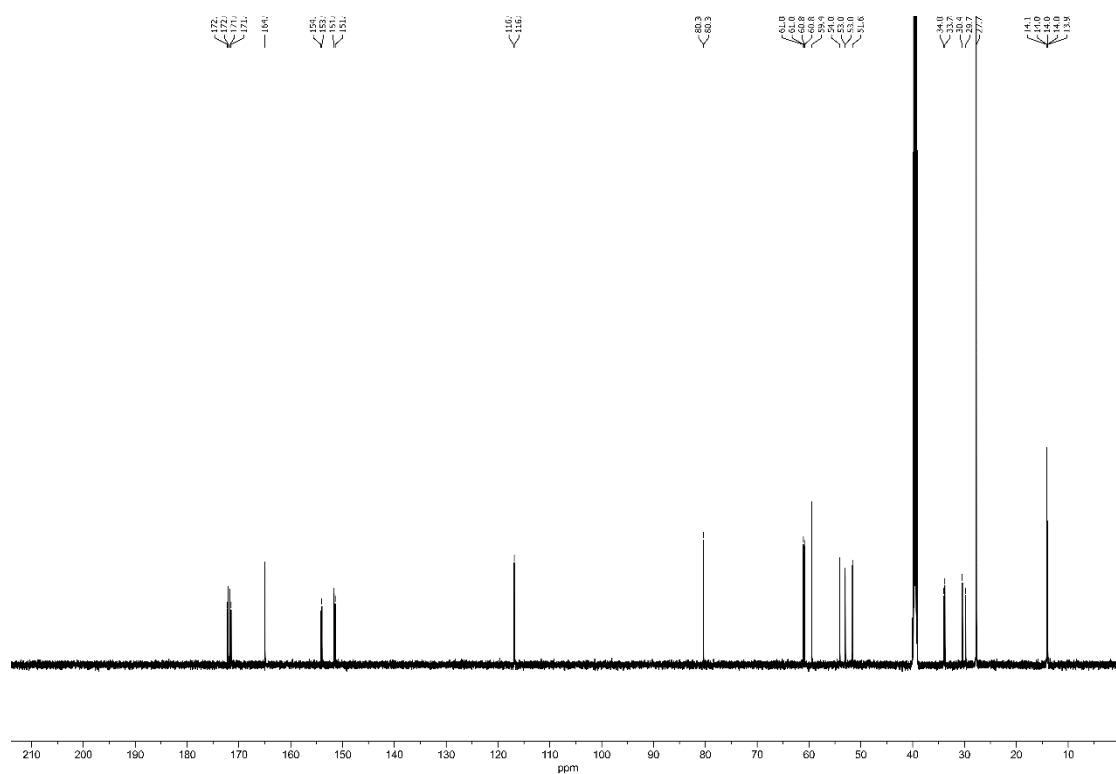

<sup>13</sup>C NMR spectrum (DMSO-*d*<sub>6</sub>) of **31**.



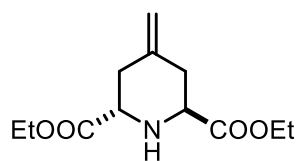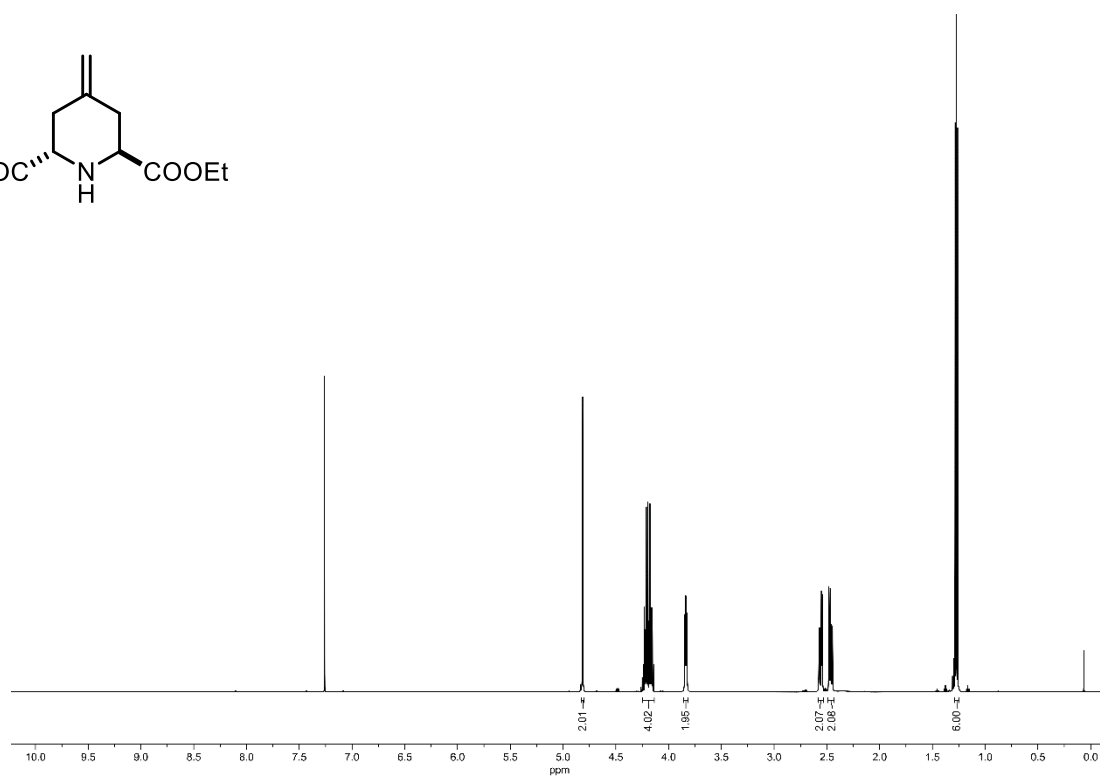

$^1\text{H}$  NMR spectrum ( $\text{CDCl}_3$ ) of **32**.

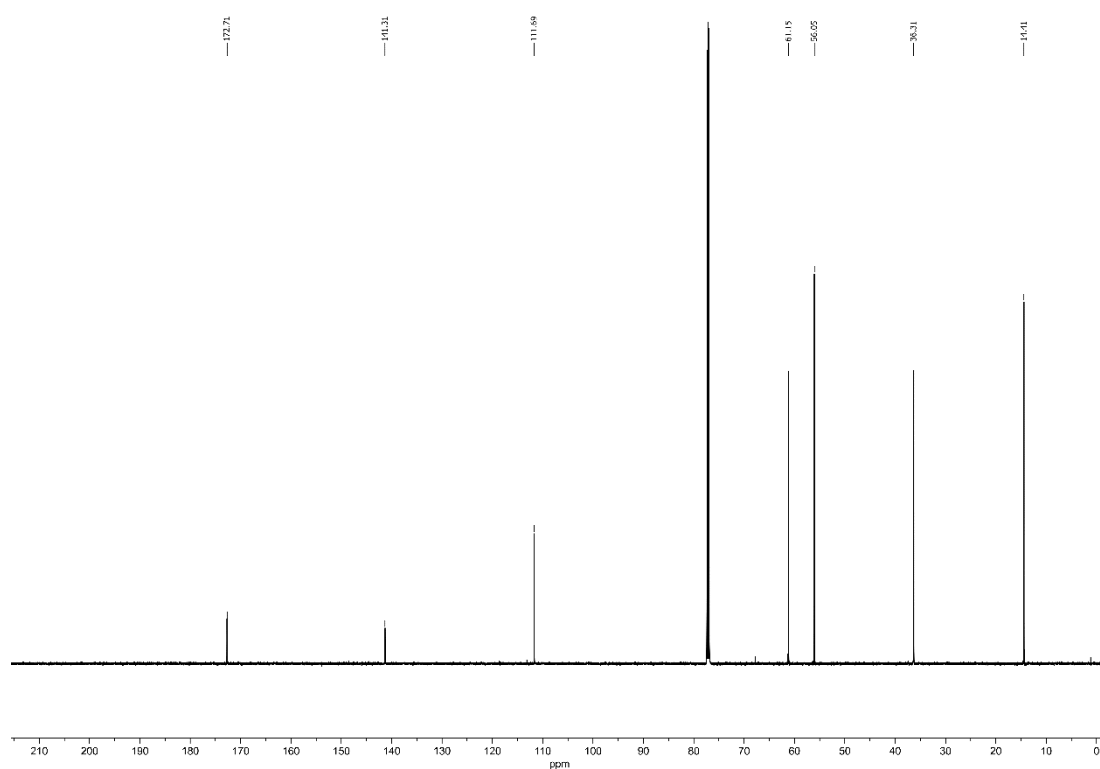

$^{13}\text{C}$  NMR spectrum ( $\text{CDCl}_3$ ) of **32**.

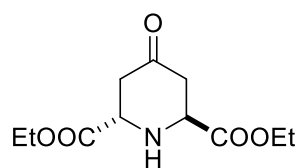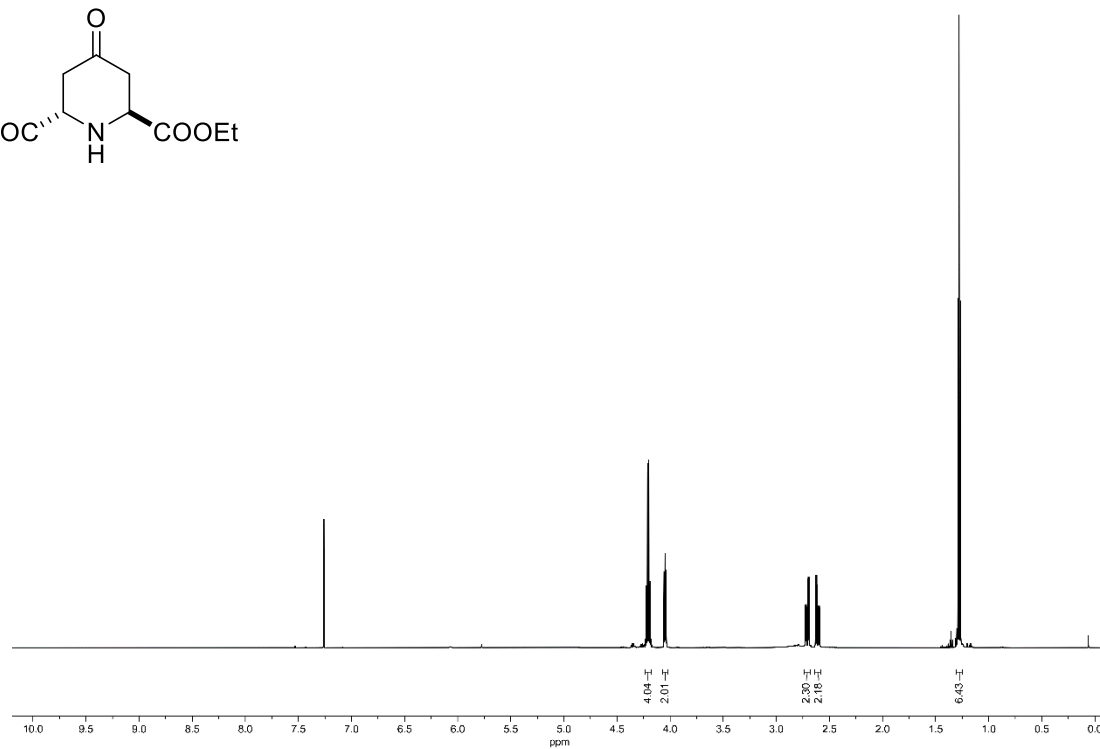

$^1\text{H}$  NMR spectrum ( $\text{CDCl}_3$ ) of **33**.

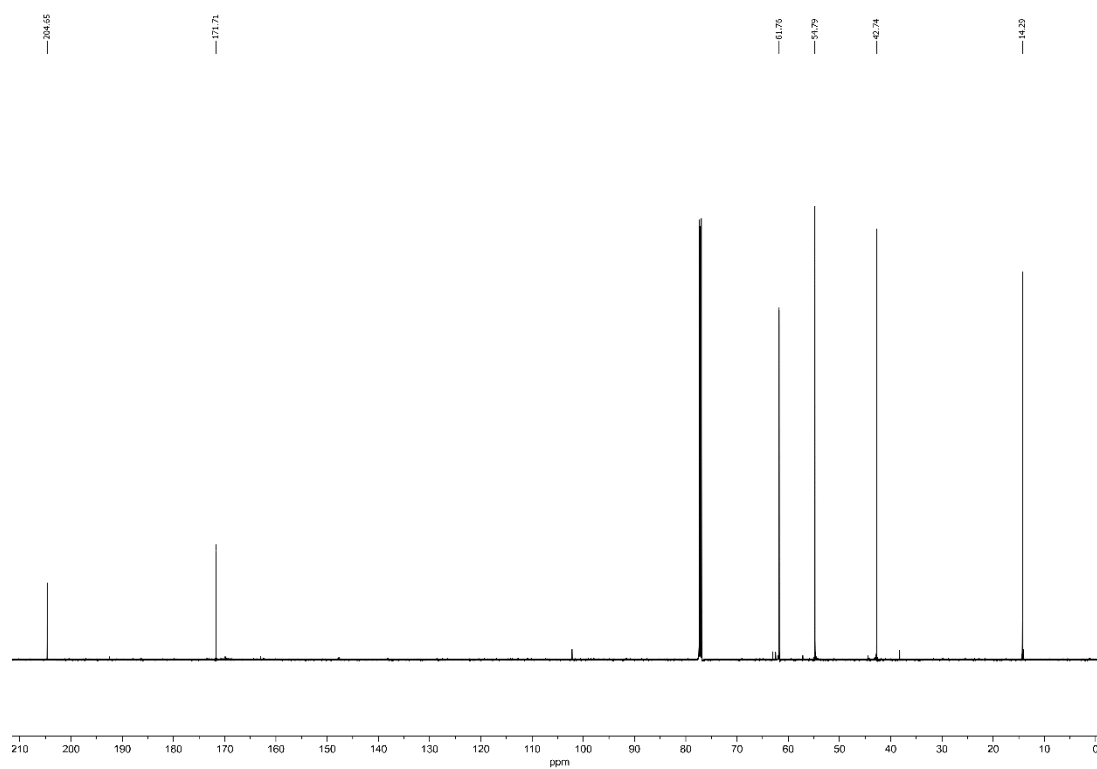

$^{13}\text{C}$  NMR spectrum ( $\text{CDCl}_3$ ) of **33**.

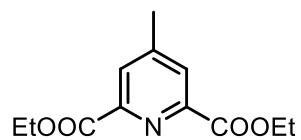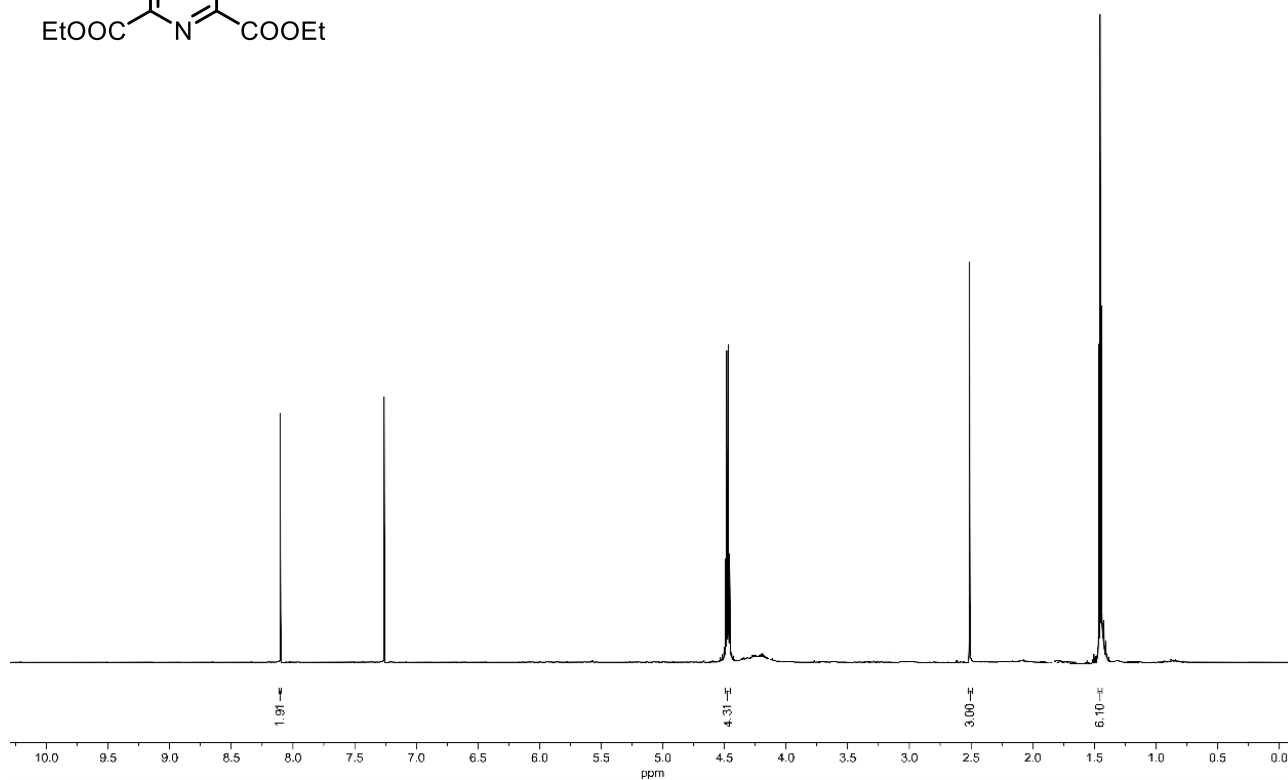

$^1\text{H}$  NMR spectrum ( $\text{CDCl}_3$ ) of **38**.

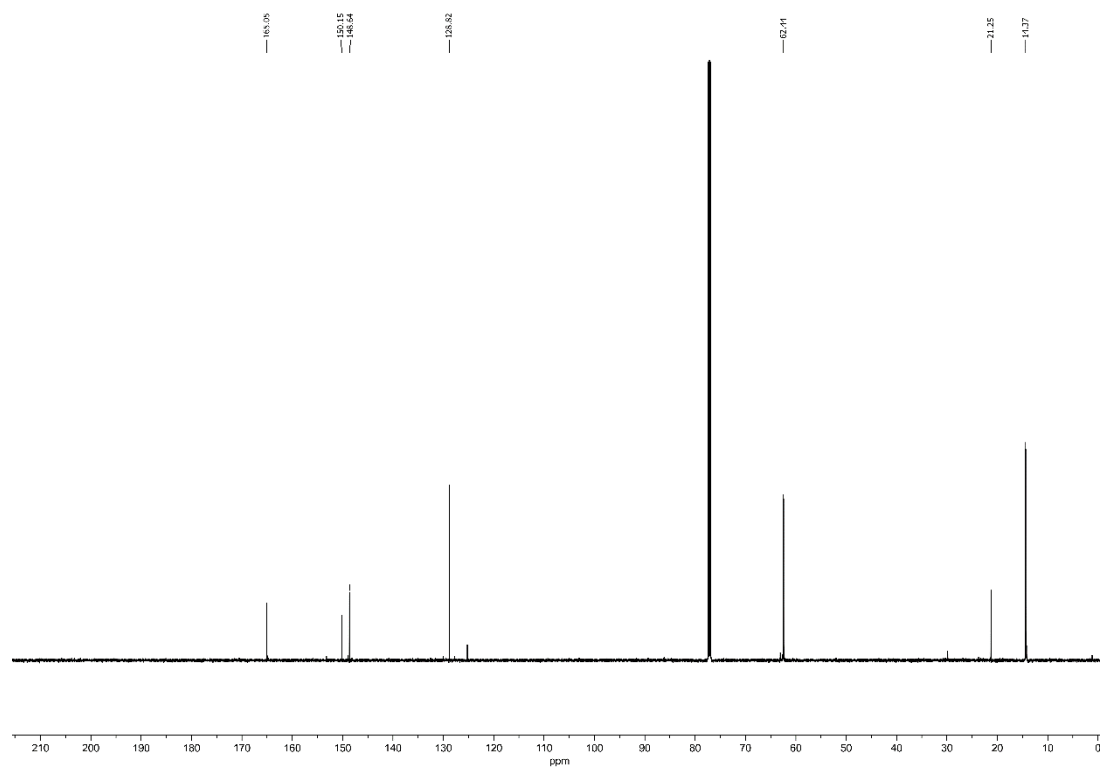

$^{13}\text{C}$  NMR spectrum ( $\text{CDCl}_3$ ) of **38**.

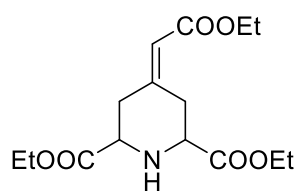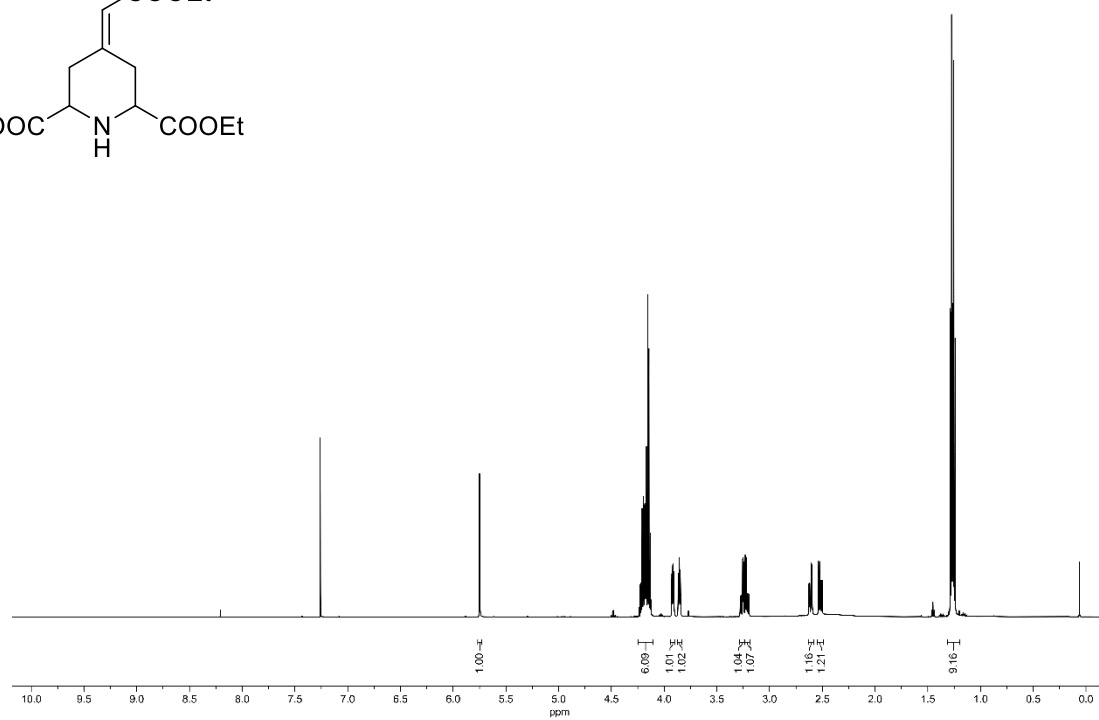

$^1\text{H}$  NMR spectrum ( $\text{CDCl}_3$ ) of **34**.

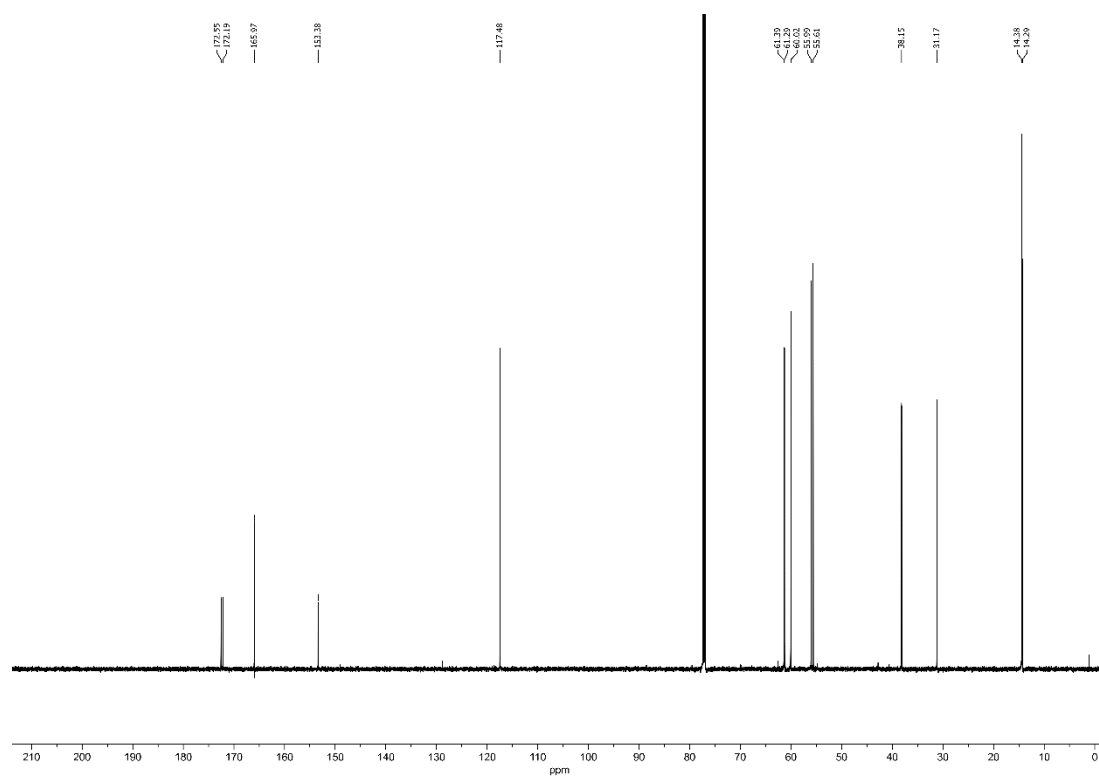

$^{13}\text{C}$  NMR spectrum ( $\text{CDCl}_3$ ) of **34**.

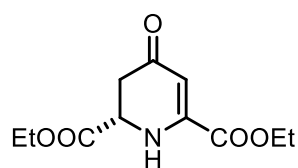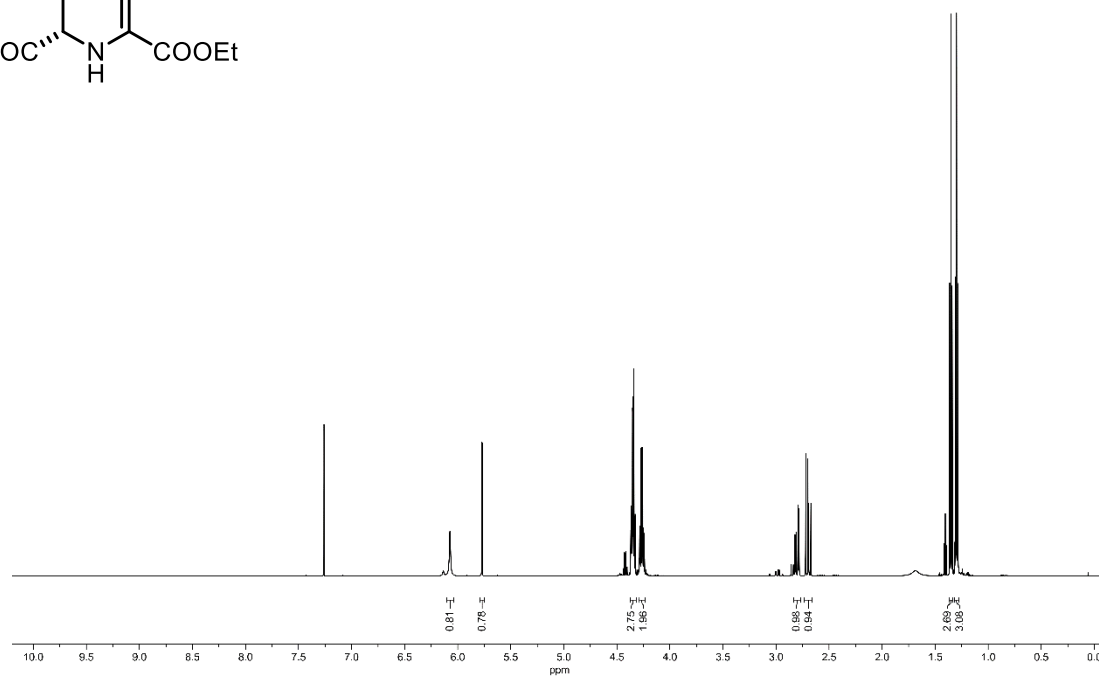

<sup>1</sup>H NMR spectrum (CDCl<sub>3</sub>) of **36**.

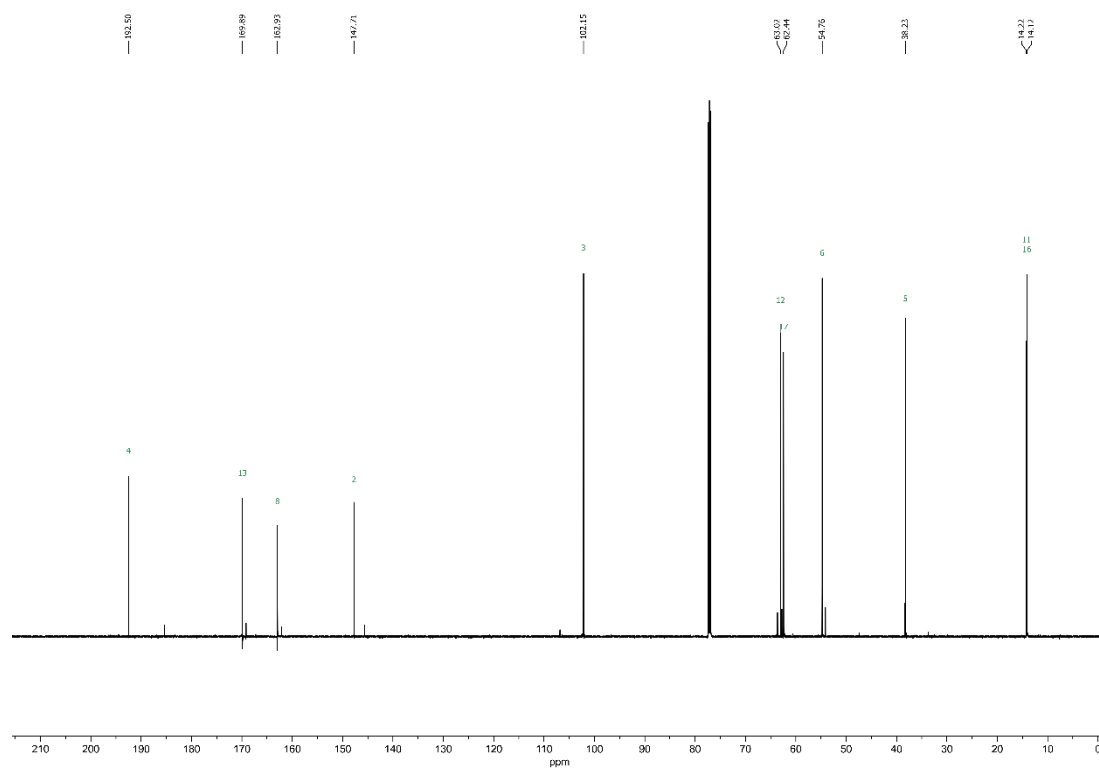

<sup>13</sup>C NMR spectrum (CDCl<sub>3</sub>) of **36**.

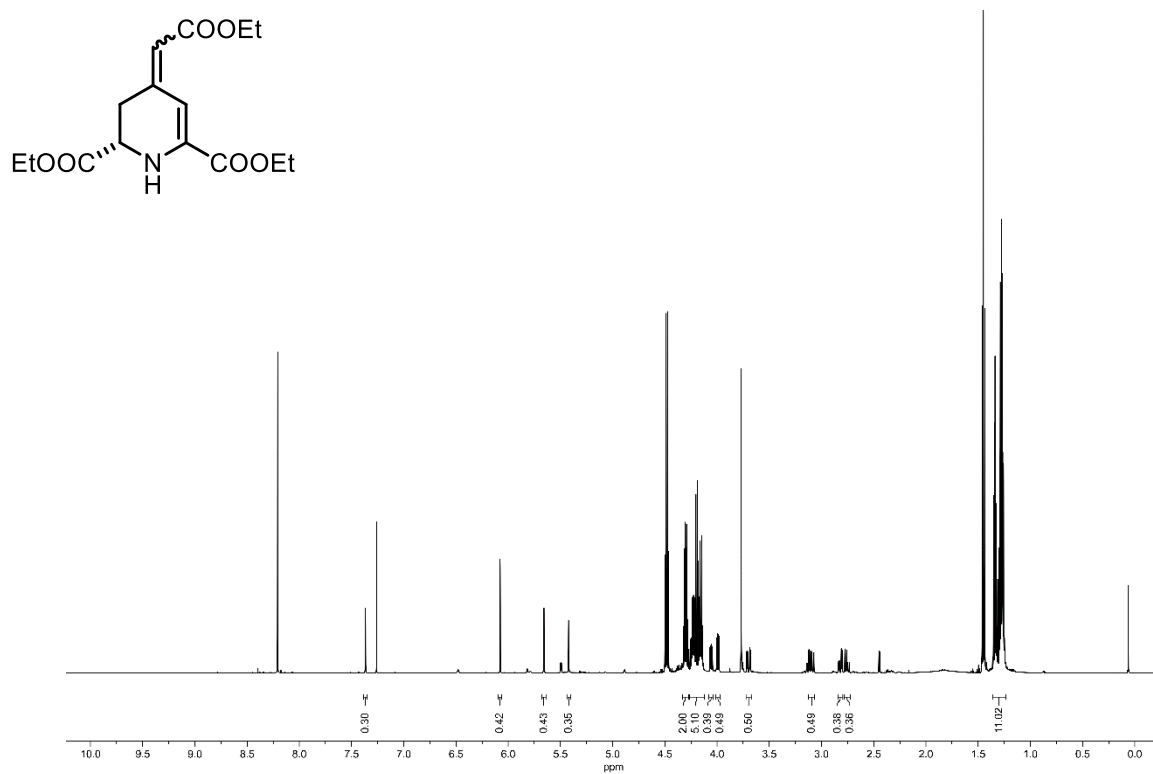

<sup>1</sup>H NMR spectrum (CDCl<sub>3</sub>) of **37**. The spectrum contains a mixture of *E/Z* isomers and its oxidized form **40**.

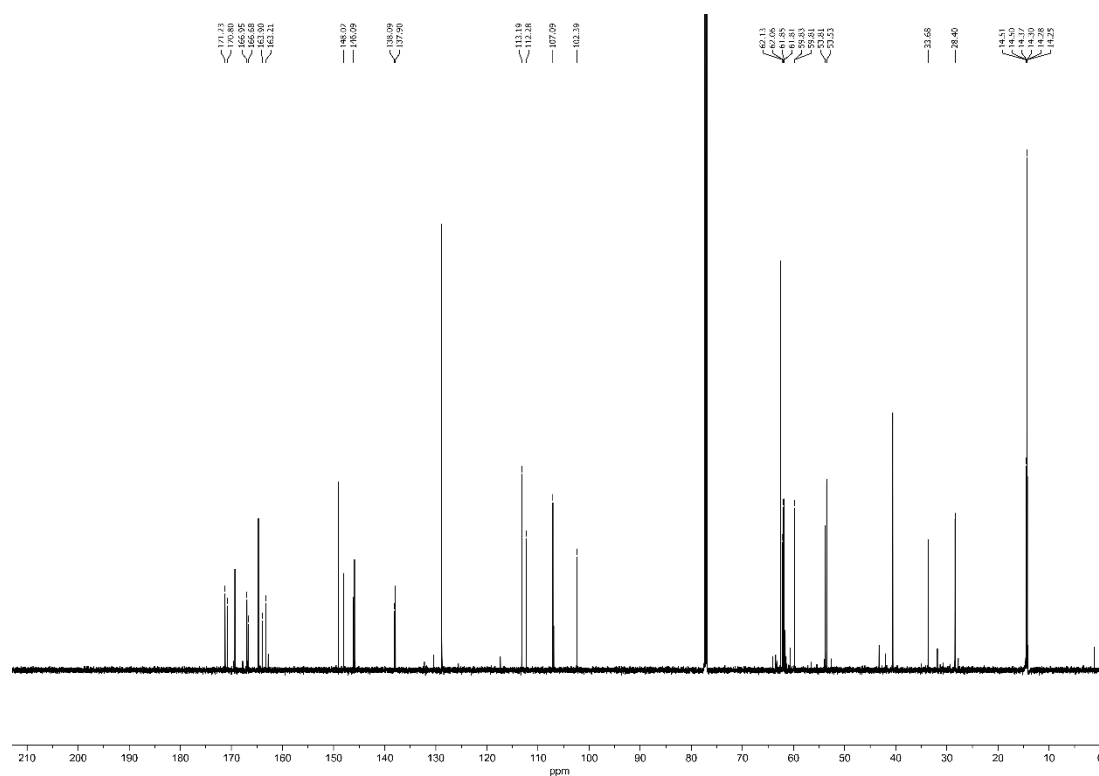

<sup>13</sup>C NMR spectrum (CDCl<sub>3</sub>) of **37**. The spectrum contains a mixture of *E/Z* isomers and its oxidized form **40**.

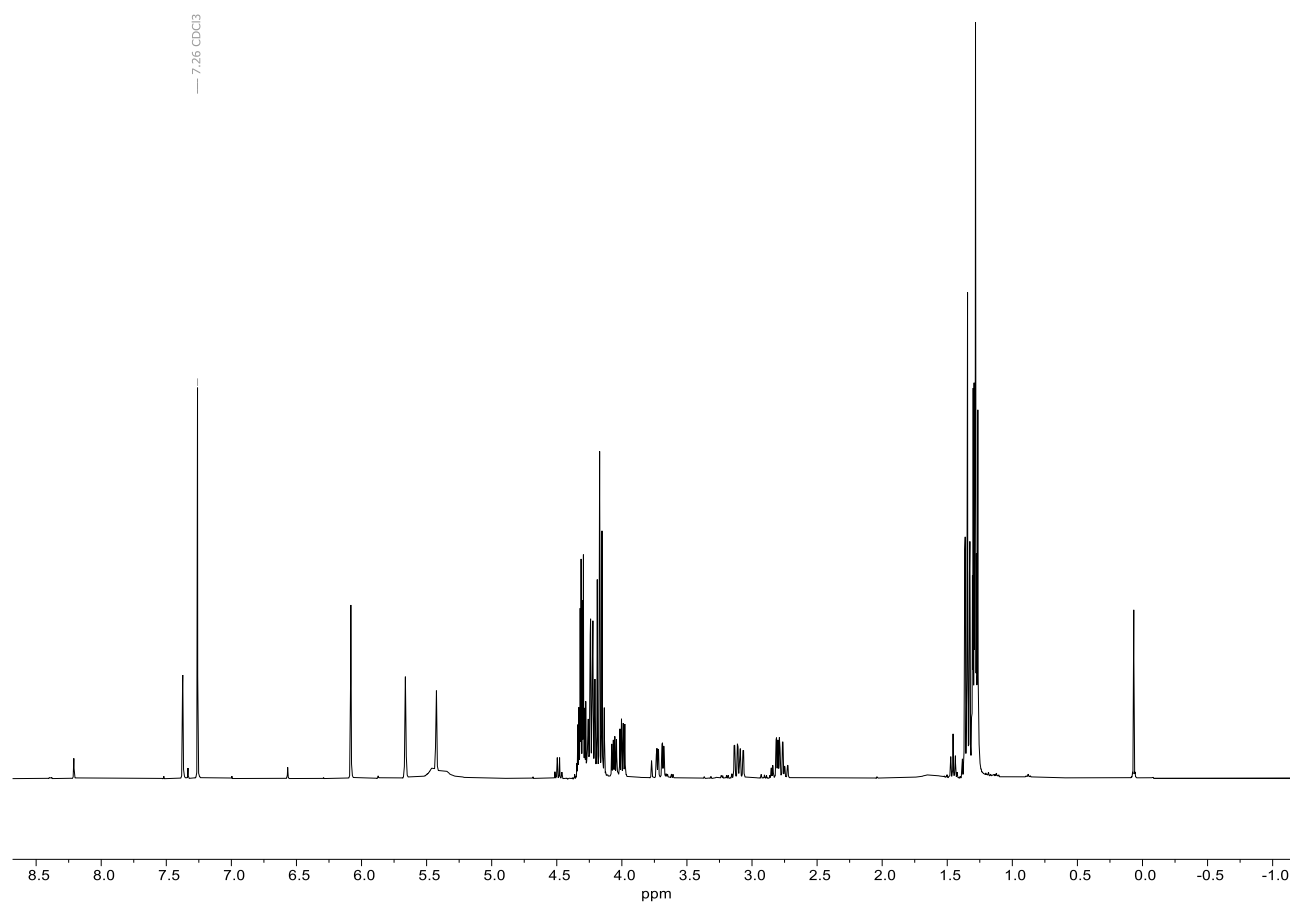

$^1\text{H}$  NMR spectrum ( $\text{CDCl}_3$ ) of **37**, 30 minutes after 2<sup>nd</sup> FC.
